# Supplementary material for: Cationic cobalt-catalyzed [1,3]-rearrangement of N-alkoxycarbonyloxyanilines
Source: publisher site journal article supplement (doi:10.3762/bjoc.14.172), 2018-07-31
Supplement: Additional file 1 [file 1860-5397-14-172-S1.pdf]

# Supporting Information

for

## Cationic cobalt-catalyzed [1,3]-rearrangement of *N*-alkoxycarbonyloxylanilines

Itaru Nakamura<sup>1\*</sup>, Mao Owada<sup>2</sup>, Takeru Jo<sup>2</sup> and Masahiro Terada<sup>1,2</sup>

Address: <sup>1</sup>Research and Analytical Center for Giant Molecule, Graduate School of Science, Tohoku University, 6-3 Aramaki Aza Aoba, Aoba-ku, Sendai 980-8578 Japan and <sup>2</sup>Department of Chemistry, Graduate School of Science, Tohoku University, 6-3 Aramaki Aza Aoba, Aoba-ku, Sendai 980-8578 Japan

Email: Itaru Nakamura - itaru-n@tohoku.ac.jp

\* Corresponding author

### General procedure and analytic data for obtained products

|                                                                                                  |     |
|--------------------------------------------------------------------------------------------------|-----|
| 1. General information                                                                           | S2  |
| 2. Thermally induced reaction of <b>1y'</b>                                                      | S2  |
| 3. Crossover experiment (analyzed by HRMS)                                                       | S3  |
| 4. Intramolecular competitive experiments                                                        | S5  |
| 5. <sup>18</sup> O-Labeling experiments                                                          | S7  |
| 6. Analytical data of <b>1</b>                                                                   | S18 |
| 7. Analytical data of <b>2</b>                                                                   | S21 |
| 8. Analytical data of <b>3</b>                                                                   | S23 |
| 9. <sup>1</sup> H and <sup>13</sup> C NMR chart of <b>1</b> , <b>2</b> , <b>3</b> , and <b>4</b> | S24 |
| 10. Reference                                                                                    | S37 |

## 1. General Information

$^1\text{H}$  and  $^{13}\text{C}$  NMR spectra were recorded on a JEOL JNM-ECS400 (400 MHz for  $^1\text{H}$  and 100 MHz for  $^{13}\text{C}$ ) spectrometer and JEOL JNM-ECA600 (150 MHz for  $^{13}\text{C}$ ) spectrometer. Chemical shifts are reported in ppm relative to  $\text{CHCl}_3$  (for  $^1\text{H}$ ,  $\delta$  7.26), and  $\text{CDCl}_3$  (for  $^{13}\text{C}$ ,  $\delta$  77.00).  $^1\text{H}$  NMR data are reported as follows: chemical shift, integration, multiplicity (s = singlet, d = doublet, t = triplet, q = quartet, sext = sextet, sept = septet, dd = double doublet, dt = double triplet, dq = double quartet, ddt = double double triplet, br = broad, m = multiplet) and coupling constants (Hz). Infrared spectra were recorded on a JASCO FT/IR-4100 spectrometer. High-resolution mass spectra analysis was performed on a Bruker Daltonics solariX FT-ICR-MS spectrometer at the Research and Analytical Center for Giant Molecules, Graduate School of Science, Tohoku University. Flash column chromatography was performed with Kanto Chemical silica gel 60N (spherical, neutral, 40–50  $\mu\text{m}$ ). Analytical thin layer chromatography (TLC) was performed on Merck precoated TLC plates (silica gel 60  $\text{F}_{254}$ ). All reactions were carried out under argon atmosphere.

Preparative procedure for the starting material **1**, general procedures for the cobalt-catalyzed reaction of **1**, and spectroscopic data for starting materials **1a–d**, **1f–i**, **1k**, **1m–v**, **1y–ab**, and products **2a–i**, **2k**, **2o–y'** are described in Supporting Information of our previous report [S1].

### Materials

$\text{CoCl}_2$  was purchased from Wako and used as received.

$\text{AgSbF}_6$  was purchased from Aldrich and used as received.

Water-18 (98%  $^{18}\text{O}$ ) was purchased from ISOTECH and used as received.

## 2. Thermally induced reaction of **1y'**

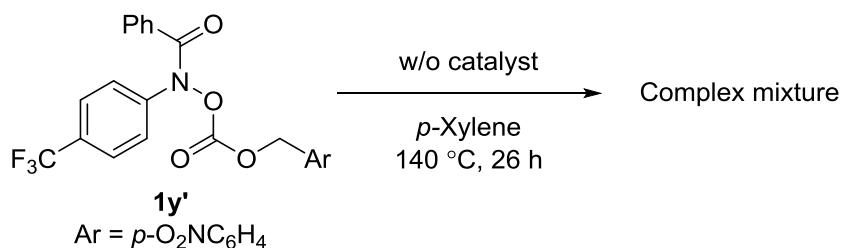

### 3. Crossover experiment analyzed by HRMS [S1]

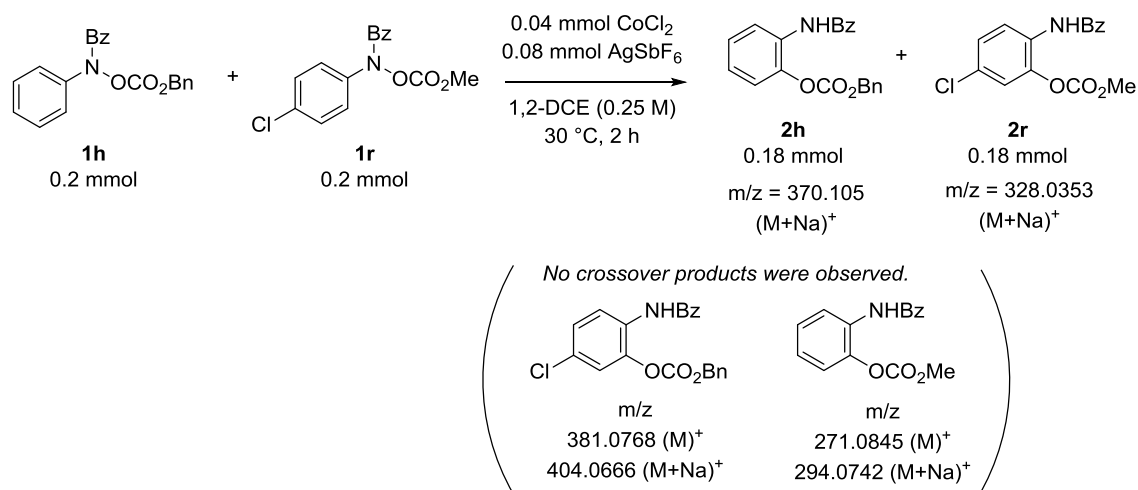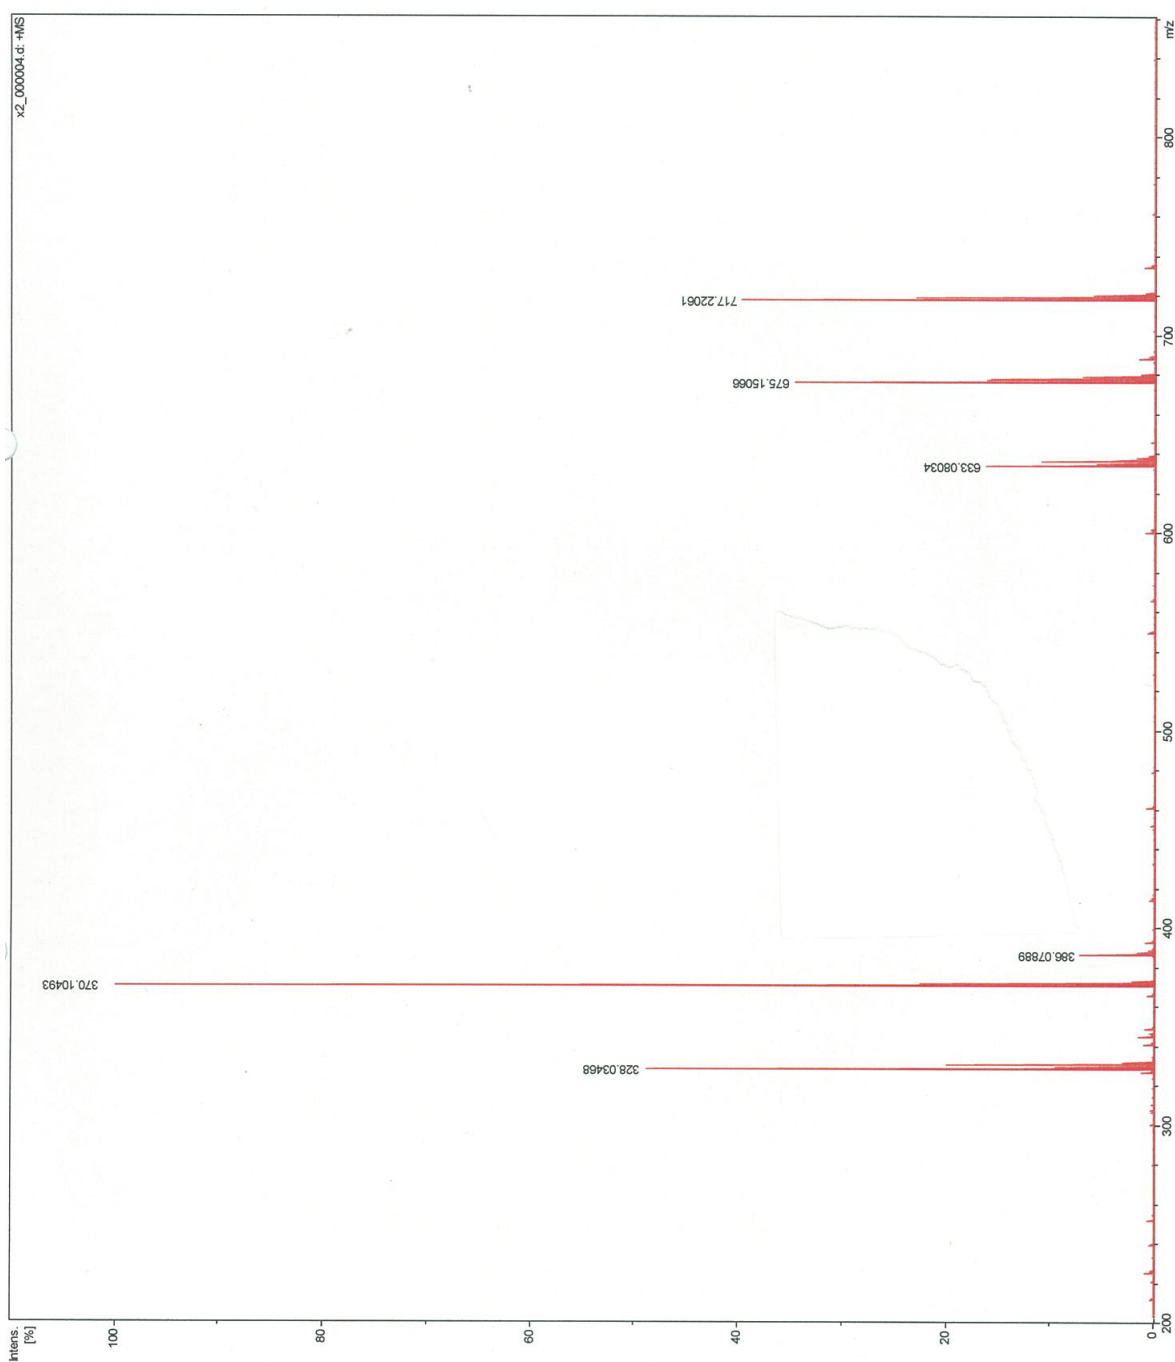

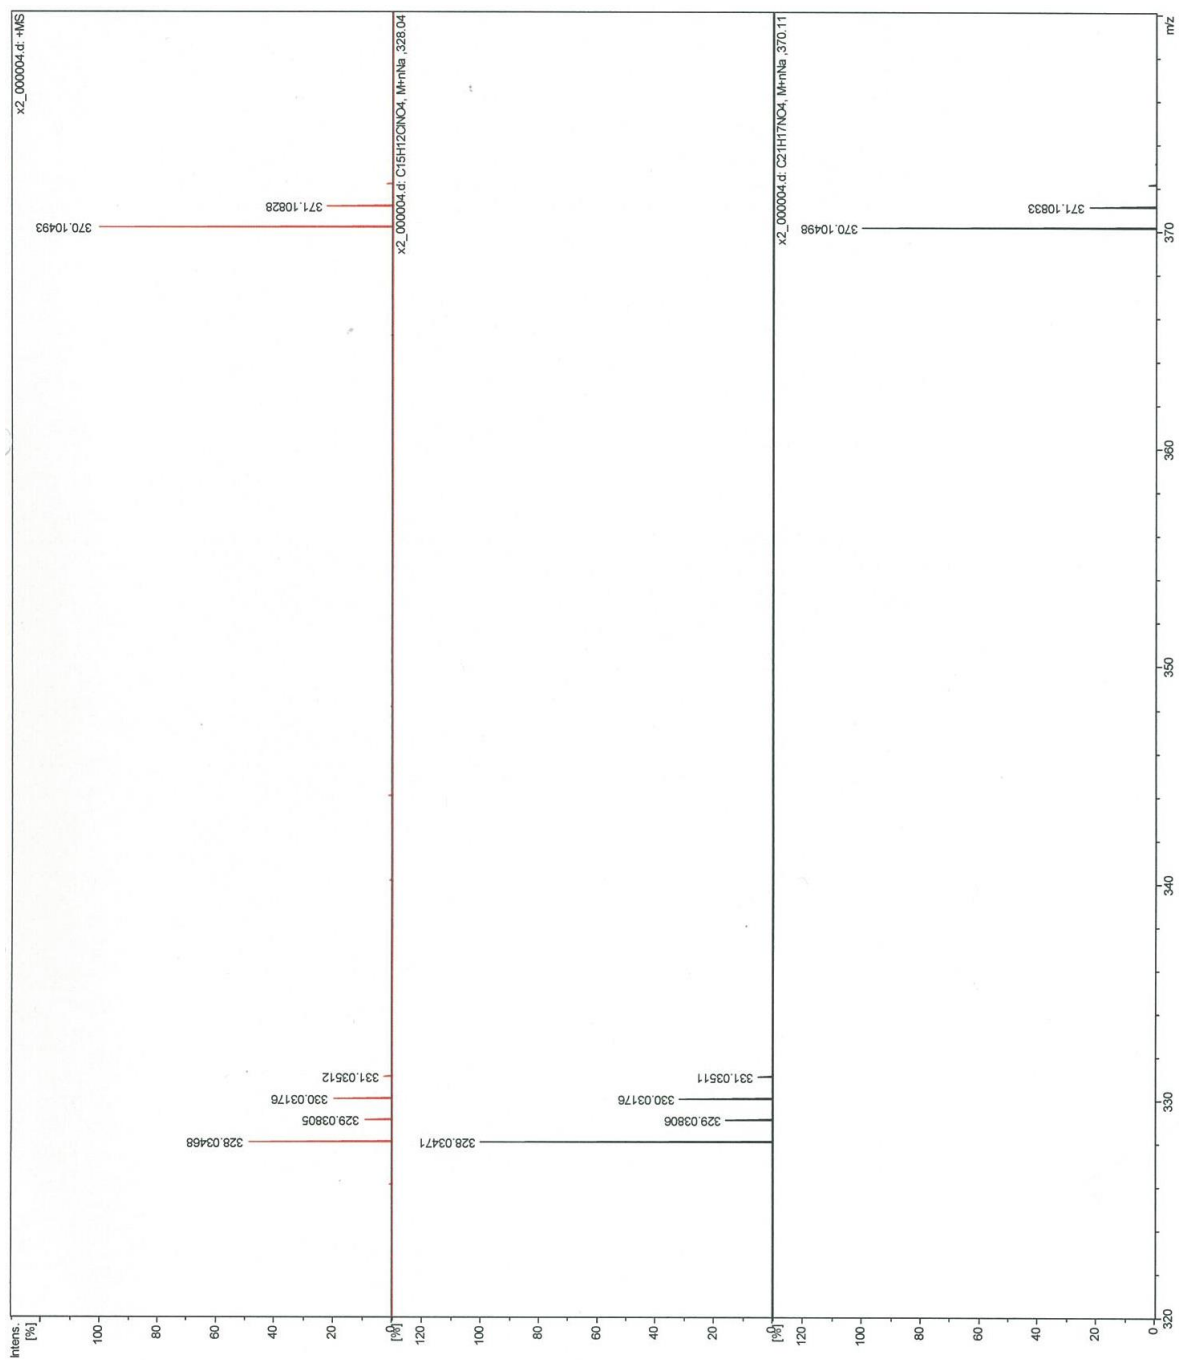

## 4. Intramolecular competitive experiments [S1]

Synthesis of nitrobenzene-*d*<sub>1</sub>

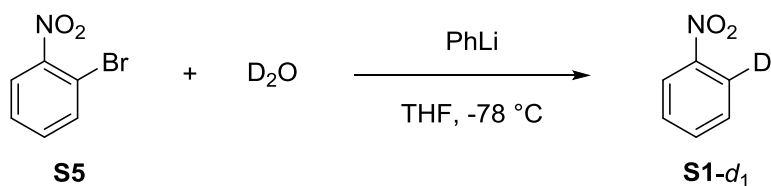

To a solution of **S5** (3.0 g, 15 mmol) in THF (50 mL) under argon atmosphere was added dropwise a 1.6 M butyl ether solution of phenyllithium (9.4 mL, 15 mmol) at  $-78^\circ\text{C}$ . After stirring the solution at  $-78^\circ\text{C}$  for 5 hours, the reaction was quenched by saturated aqueous sodium chloride. Then, the mixture was extracted with ether and the organic layer was washed by brine and dried over sodium sulfate. After the solvent was removed in vacuo, the residue was purified by distillation to obtain **S1-*d*<sub>1</sub>** (89% D, 0.9 mmol, 6% yield).

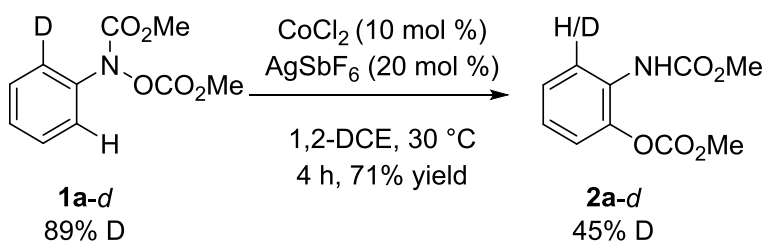

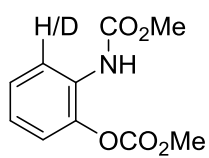

**2a-d**

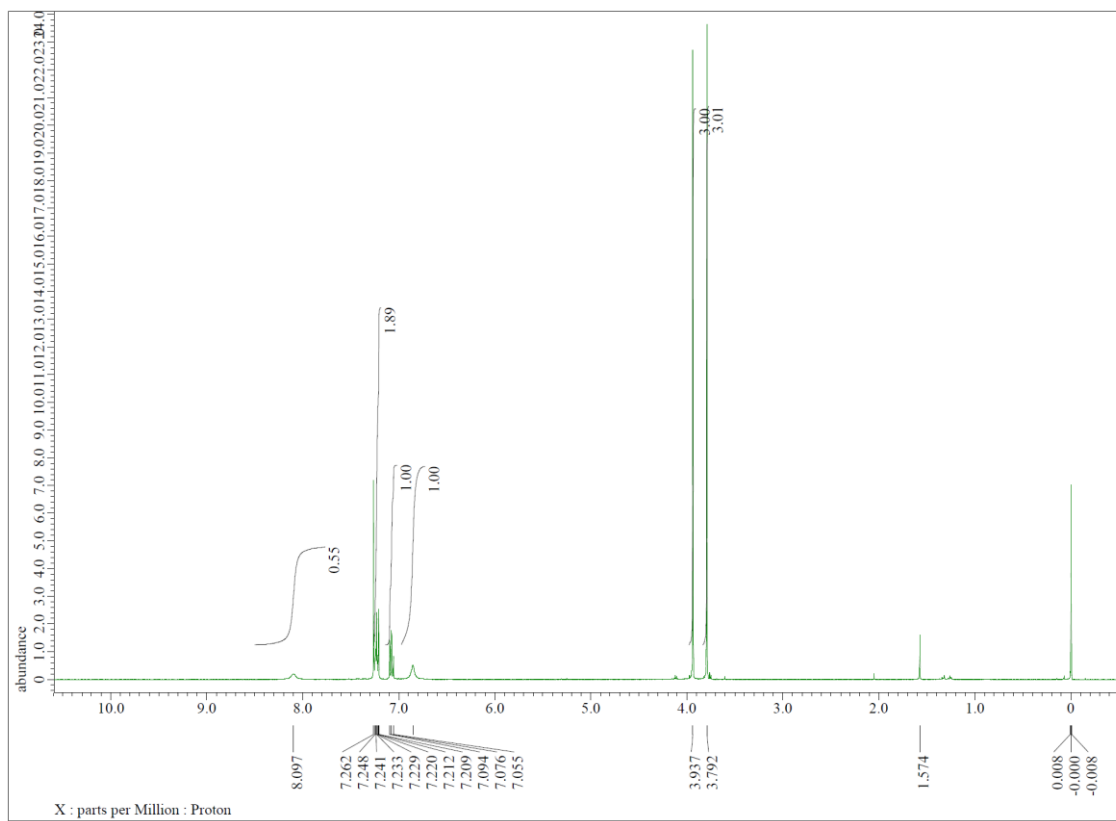

## 5. $^{18}\text{O}$ -Labeling experiments [S1]

### a) Preparation of nitrobenzene- $^{18}\text{O}$

$^{18}\text{O}$ -labelled sodium nitrate [S2] and nitrobenzene- $^{18}\text{O}$  [S3] were prepared according to a reported procedure.  $^{18}\text{O}$  content was determined by intensity of mass spectra.

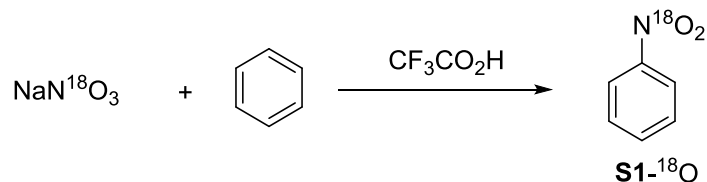

To water- $^{18}\text{O}$  was (0.3 mL, 16.6 mmol) in a 10 mL flask was added fumed nitric acid ( $d = 1.5$ , 0.1 mL, 2.4 mmol) and the solution in the tightly sealed flask was stirred at room temperature for 4 days. Then, to the solution was added sodium hydroxide (382 mg) in water- $^{18}\text{O}$  (0.344 mL) and stirred for 24 hours. After water- $^{18}\text{O}$  was distilled, fumed nitric acid (0.016 mL) was added to the residue. The mixture was stirring at  $70\text{ }^\circ\text{C}$  for 24 hours. After confirming that the solution was not acidic by pH test paper, water- $^{18}\text{O}$  was distilled out. To the residue was added benzene (0.14 mL, 1.53 mmol) and trifluoroacetic acid (7.7 mL). The solution was stirred at room temperature for 24 hours. The reaction was quenched by 3 N NaOH in water- $^{18}\text{O}$  until the solution was neutralized. The mixture was extracted three times with ether. Ether of the organic layer was distilled out. The obtained nitrobenzene- $^{18}\text{O}$  ( $^{18}\text{O}$  56%) was utilized without further purification.

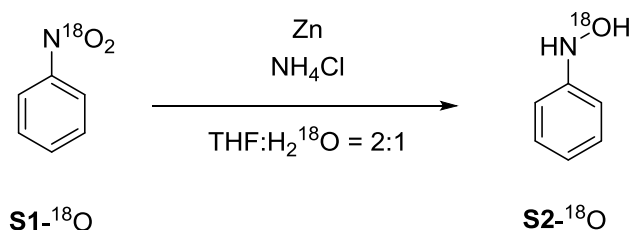

To a solution of nitrobenzene- $^{18}\text{O}$  in THF (3.6 mL) were added water- $^{18}\text{O}$  (1.8 mL) and ammonium chloride (52.96 mg) at  $0\text{ }^\circ\text{C}$  under argon atmosphere. Then, the solution was added portion-wise zinc power (91.53 mg). After the solution was stirred at  $0\text{ }^\circ\text{C}$  for 2.5 hours, The reaction mixture was passed through a short pad of silica gel with ethyl acetate. After solvents were removed in vacuo, the crude product was purified by flash silica gel column chromatography using hexane/ethyl acetate (3/1) as eluents. After column chromatography, **S2- $^{18}\text{O}$**  was not completely concentrated in order to avoid decomposition.

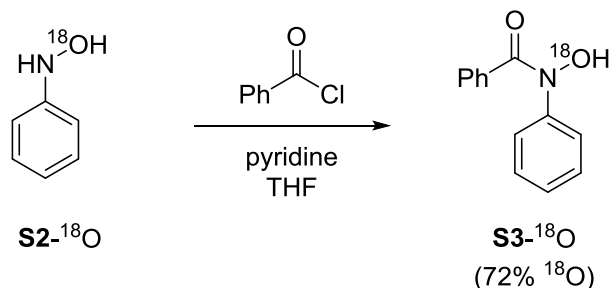

To a solution of **S2-<sup>18</sup>O** in THF (8 mL) was added pyridine at 0 °C under argon atmosphere. Benzoyl chloride was added dropwise to the solution. The solution was stirred at 0 °C with monitoring by TLC. After complete consumption of **S2-<sup>18</sup>O** for 1 hour, the solution was quenched by ammonium chloride. The reaction mixture was passed through a short pad of silica gel with dehydrated dichloromethane. After removing solvents in vacuo, the crude product was purified by silica gel column chromatography using hexane/ethyl acetate (3/1 to 2/1) as eluent to obtain **S3-<sup>18</sup>O** (72% <sup>18</sup>O, 0.4 mmol, 16% yield based on fumed nitric acid in the first step).

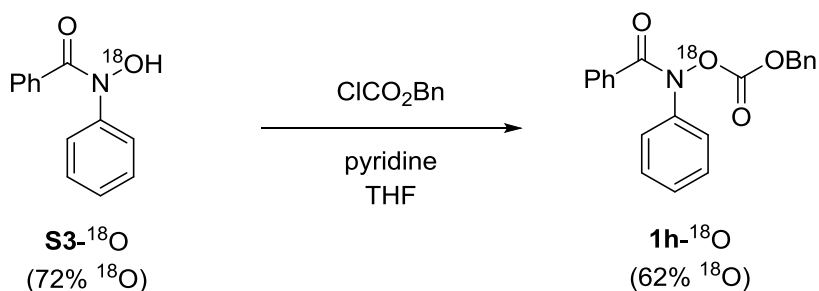

To a solution of **S3-<sup>18</sup>O** (94 mg, 0.396 mmol) in THF (8.8 mL) was added pyridine (36  $\mu$ L, 0.44 mmol) at 0 °C under argon atmosphere. Then, benzyl chloroformate (64  $\mu$ L, 0.45 mmol) was added dropwise to the solution. After 1 hour, the reaction was quenched by water and the reaction mixture was extracted with ether three times. The organic layer was washed with brine and dried over sodium sulfate. The crude product was purified by silica gel column chromatography to obtain **1h-<sup>18</sup>O** (62% <sup>18</sup>O, 0.37 mmol, 84% yield).

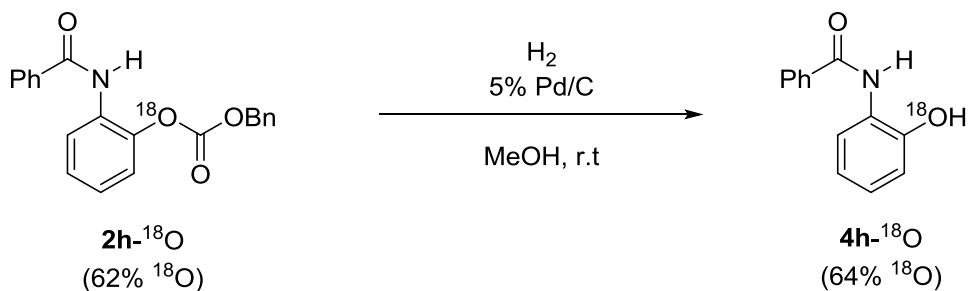

To a solution of **2h-<sup>18</sup>O** (34.8 mg, 0.10 mmol) in methanol (8.3 mL) in a 20 mL round-bottom flask was added 5% Pd/C under nitrogen atmosphere. Nitrogen gas was evacuated until



the solvent began to bubble, and then the flask was filled with hydrogen gas. The suspension was stirred at room temperature for 24 hours. The reaction mixture was filtered through celite and the filtrate was concentrated in vacuo. The residue was passed through a short pad of silica gel with ethyl acetate. The solution was washed with water and the water layer was extracted with ether and ethyl acetate. The combined organic layer was concentrated in vacuo to obtain **4h**-<sup>18</sup>O (64% <sup>18</sup>O, 0.053 mmol, 53% yield) in an analytically pure form.

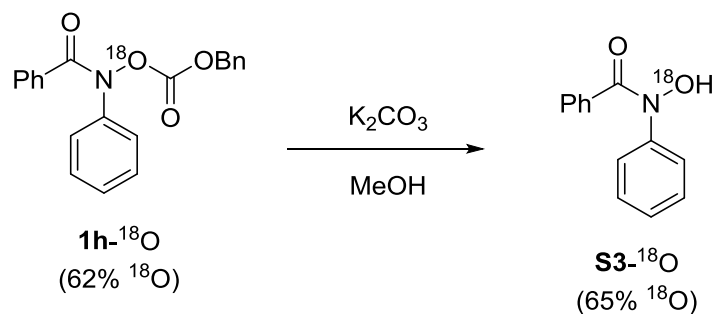

To **1h**-<sup>18</sup>O (17.4 mg, 0.05 mmol) were added potassium carbonate (0.40 mg, 2.89 mmol) and methanol (0.3 mL). Then, the suspension was stirred for 6 hours. The mixture was purified by silica gel column chromatography using hexane/ethyl acetate (2.5:1) as eluent to obtain **S3**-<sup>18</sup>O (65% <sup>18</sup>O) in 38% yield.

This result clearly indicates that oxygen-18 existed at the hydroxylamine moiety in **1h**-<sup>18</sup>O.

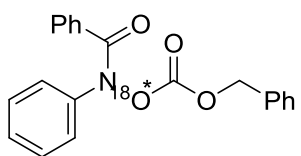

**1h-<sup>18</sup>O**

$m/z = 372.1092 \text{ (M+Na)}^+$

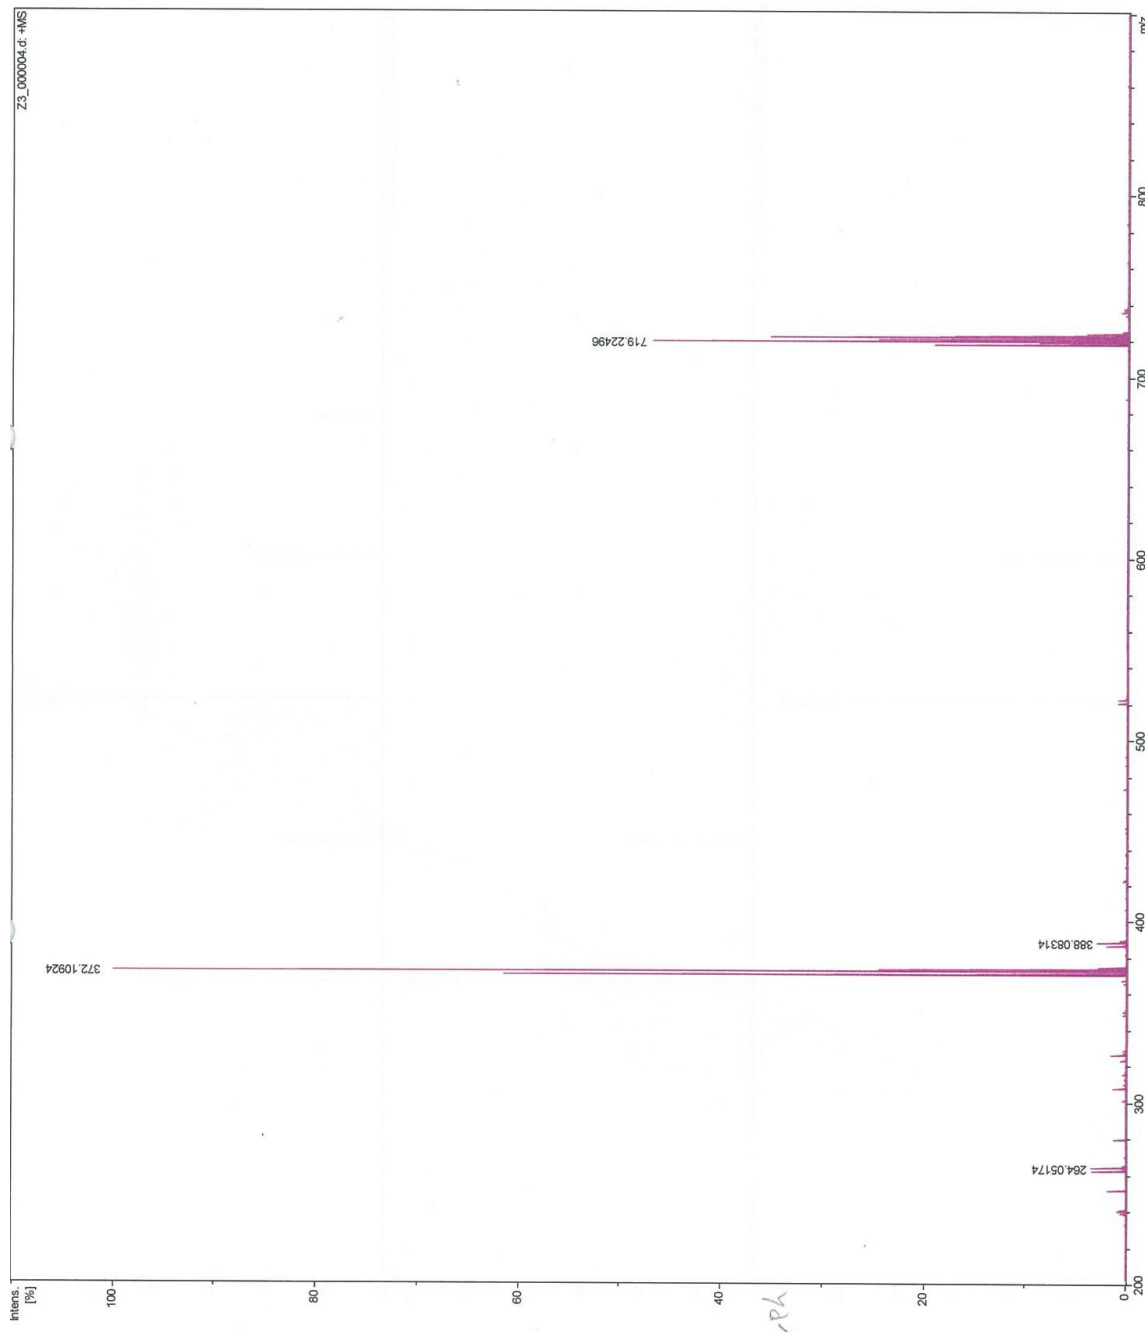

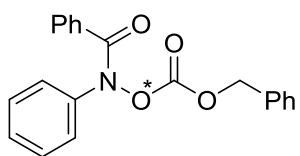

**1h-<sup>18</sup>O**

$m/z(\text{calcd}) = 372.1098 \text{ (M+Na)}^+$

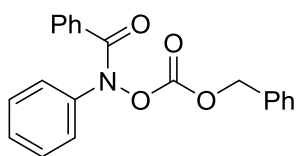

**1h**

$m/z(\text{calcd}) = 370.1055 \text{ (M+Na)}^+$

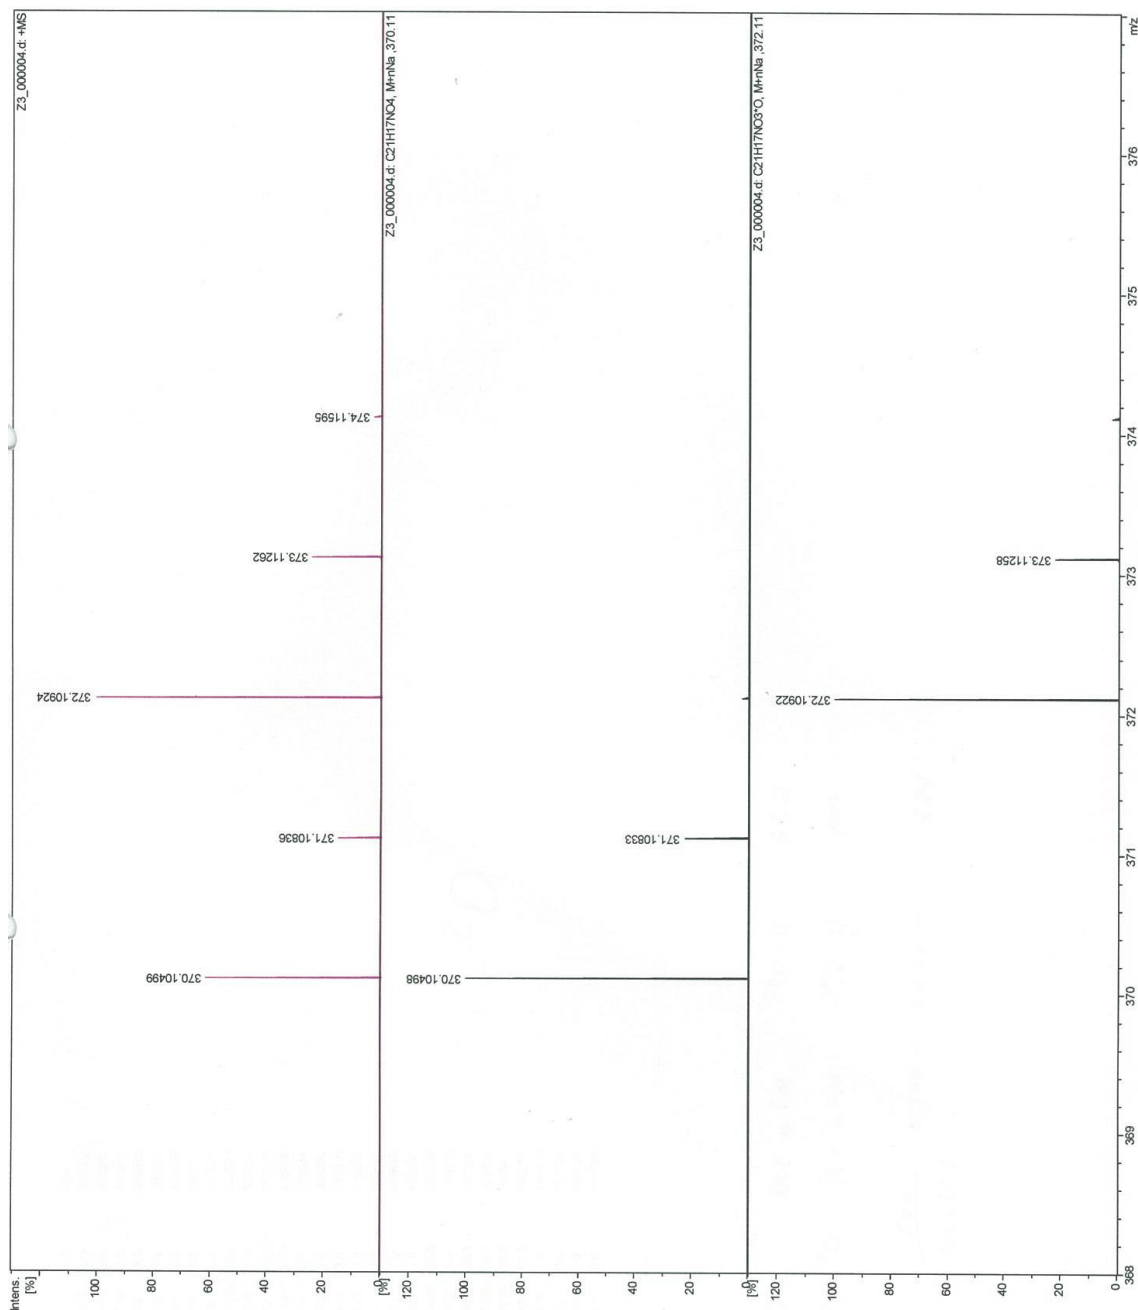

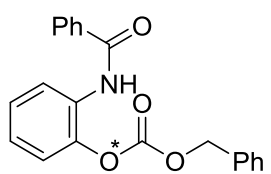

**2h-<sup>18</sup>O**

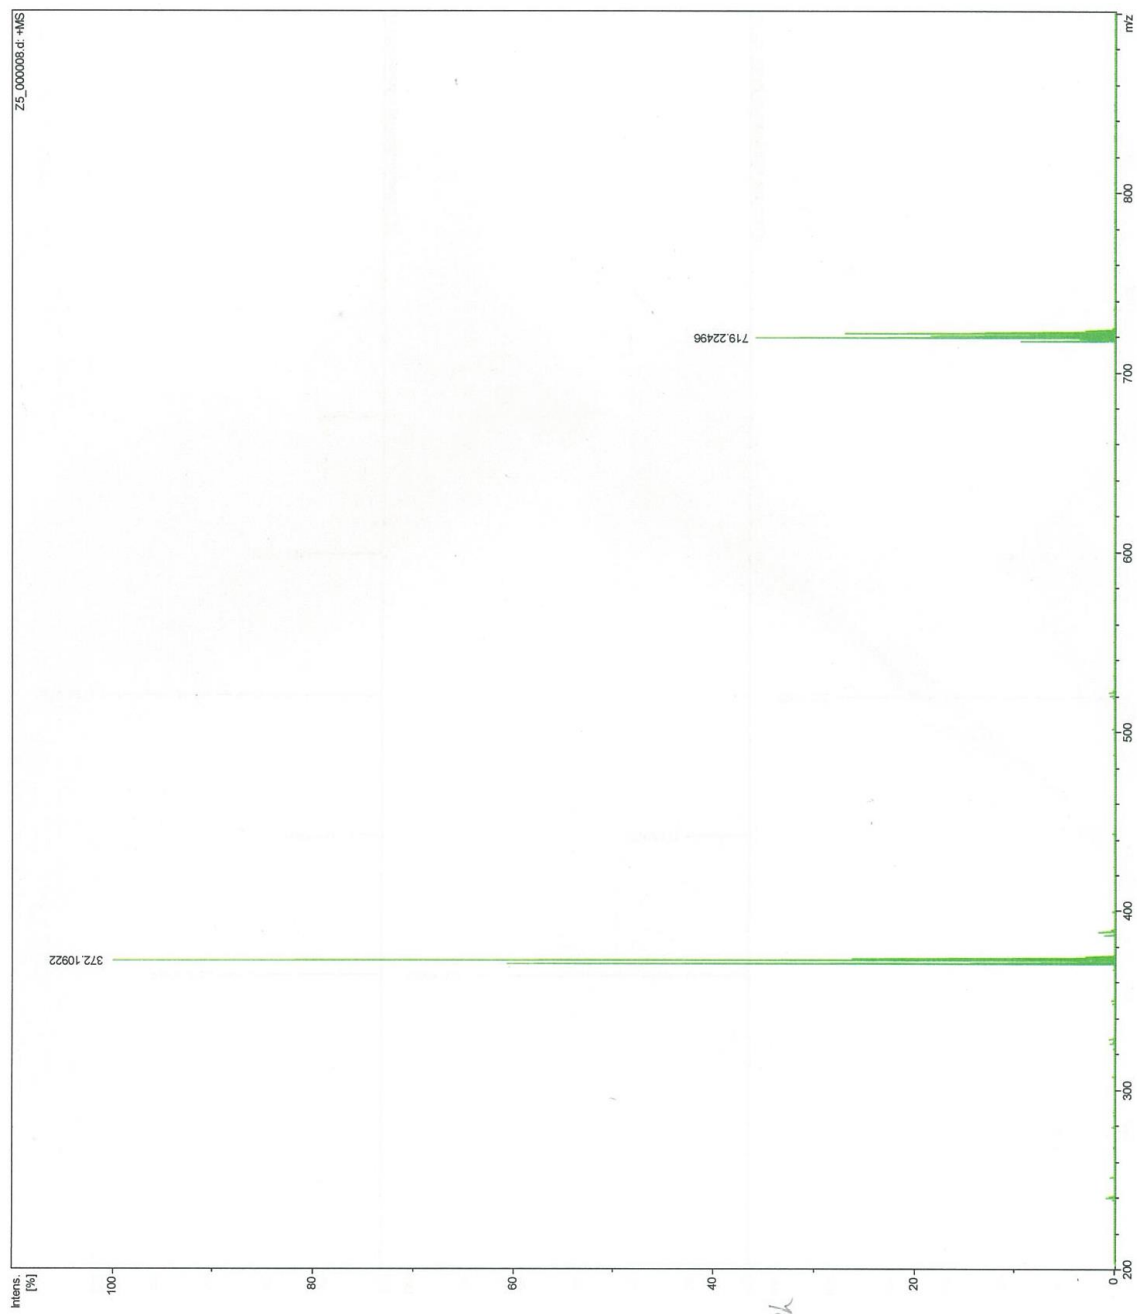

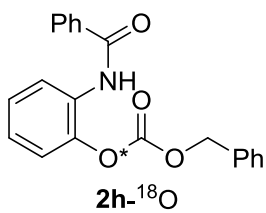

$m/z(\text{calcd}) = 372.1092 \text{ (M+Na)}^+$

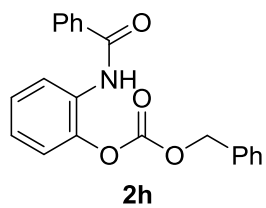

$m/z(\text{calcd}) = 370.1055 \text{ (M+Na)}^+$

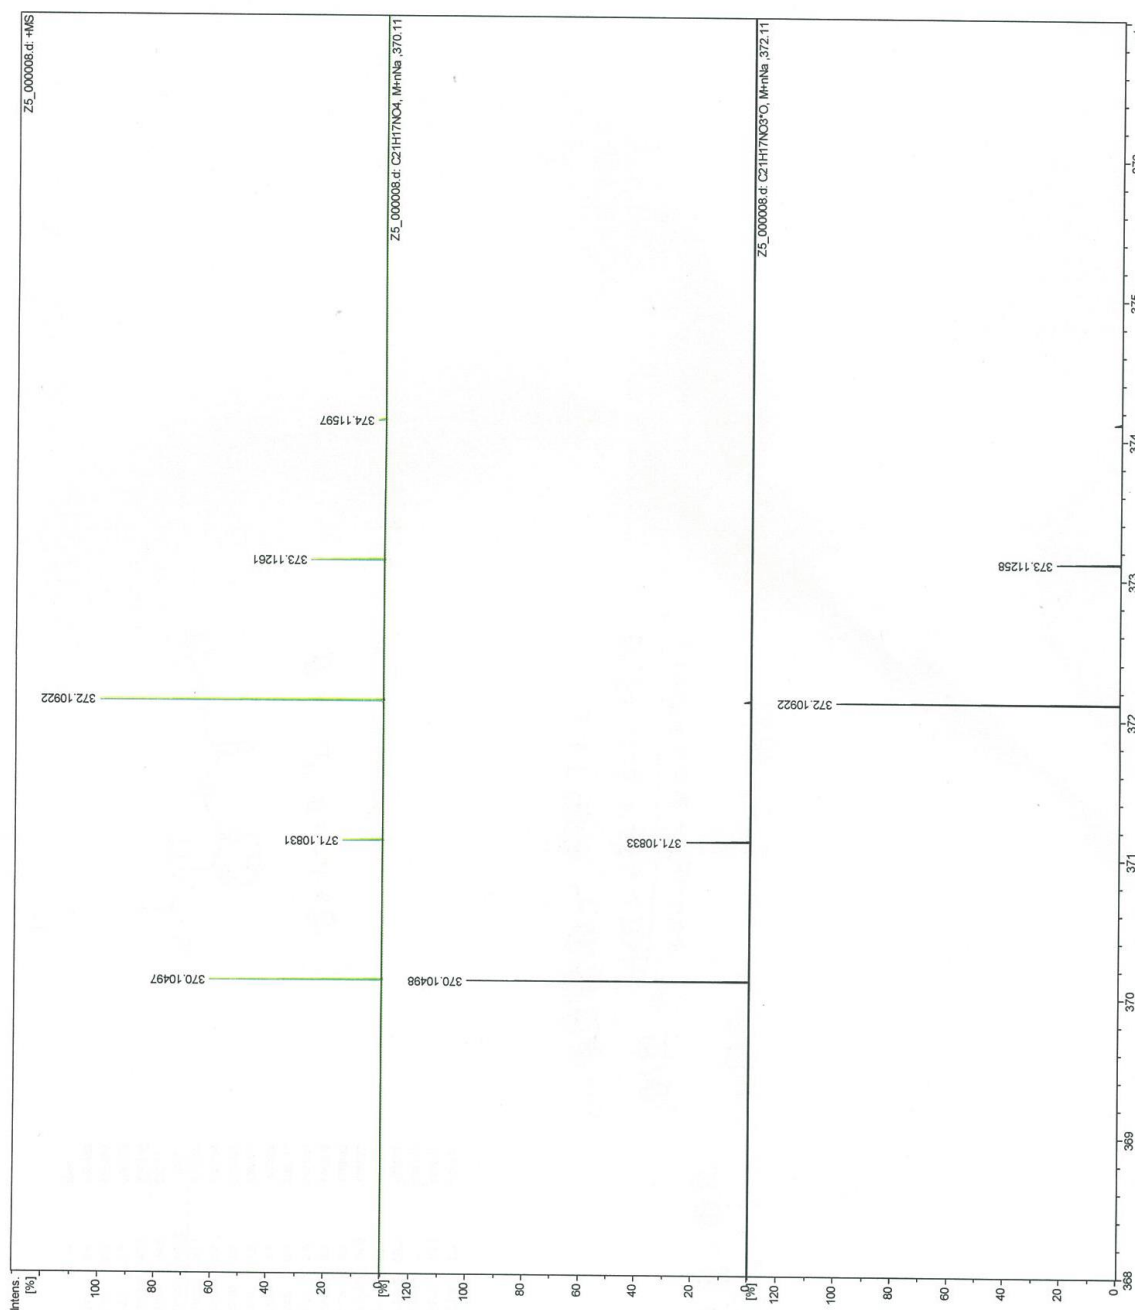

**4h-<sup>18</sup>O** obtained by the Co-catalyzed reaction of **1h-<sup>18</sup>O** followed by deprotection.

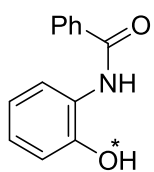

**4h-<sup>18</sup>O**

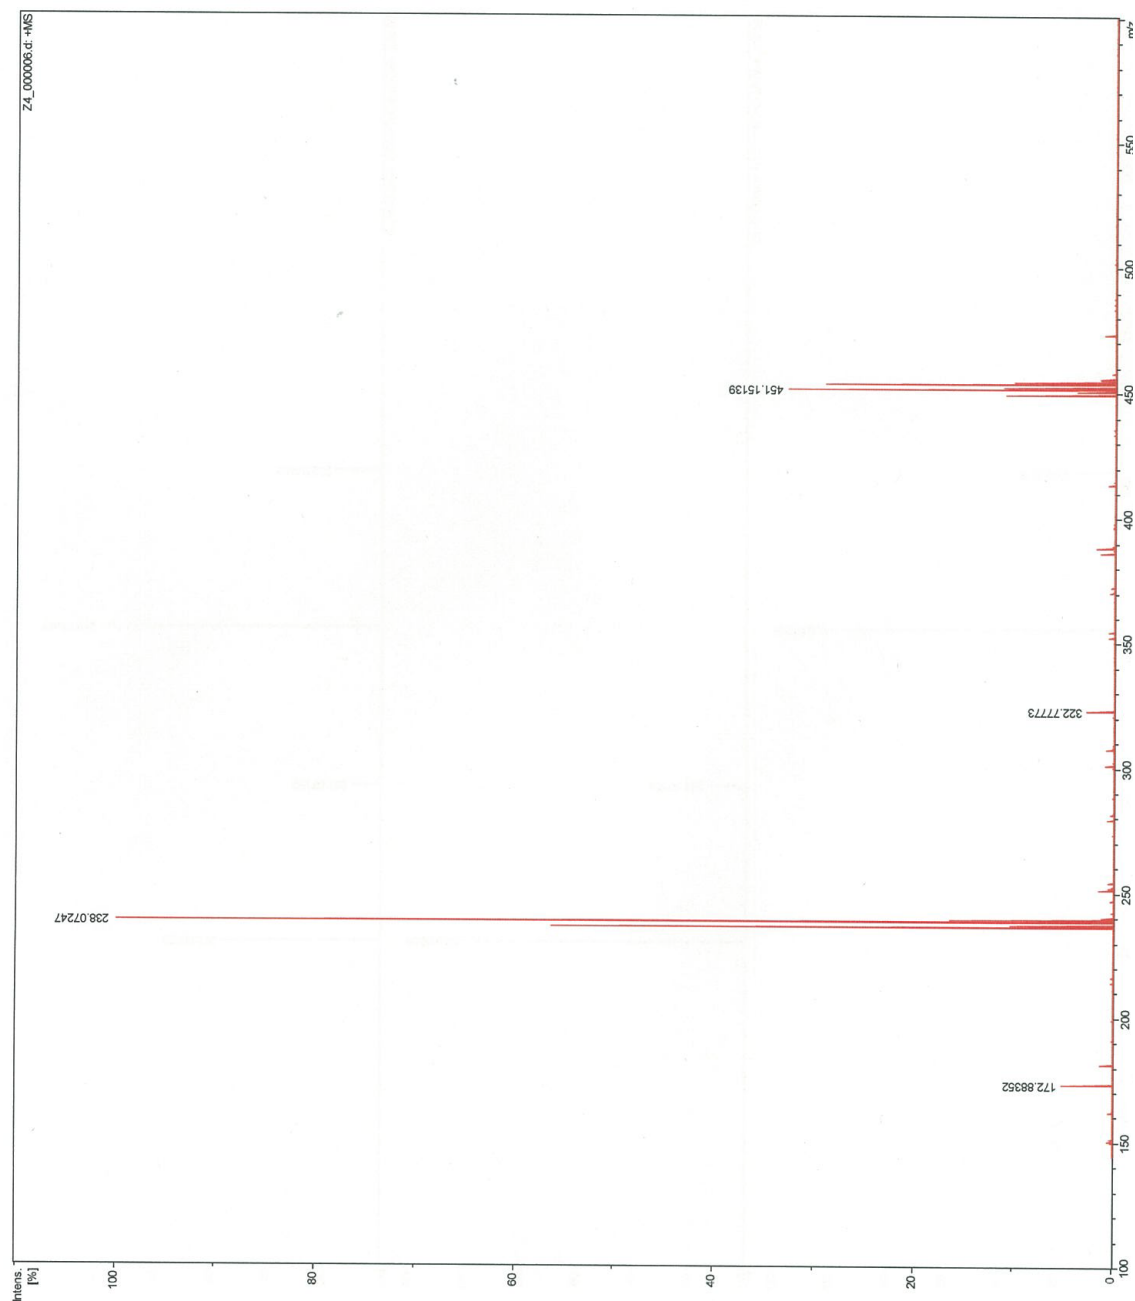

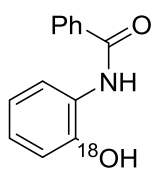

**4h-<sup>18</sup>O**

$m/z(\text{calcd}) = 238.0725 \text{ (M+Na)}^+$

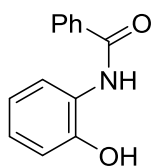

**4h**

$m/z(\text{calcd}) = 236.0682 \text{ (M+Na)}^+$

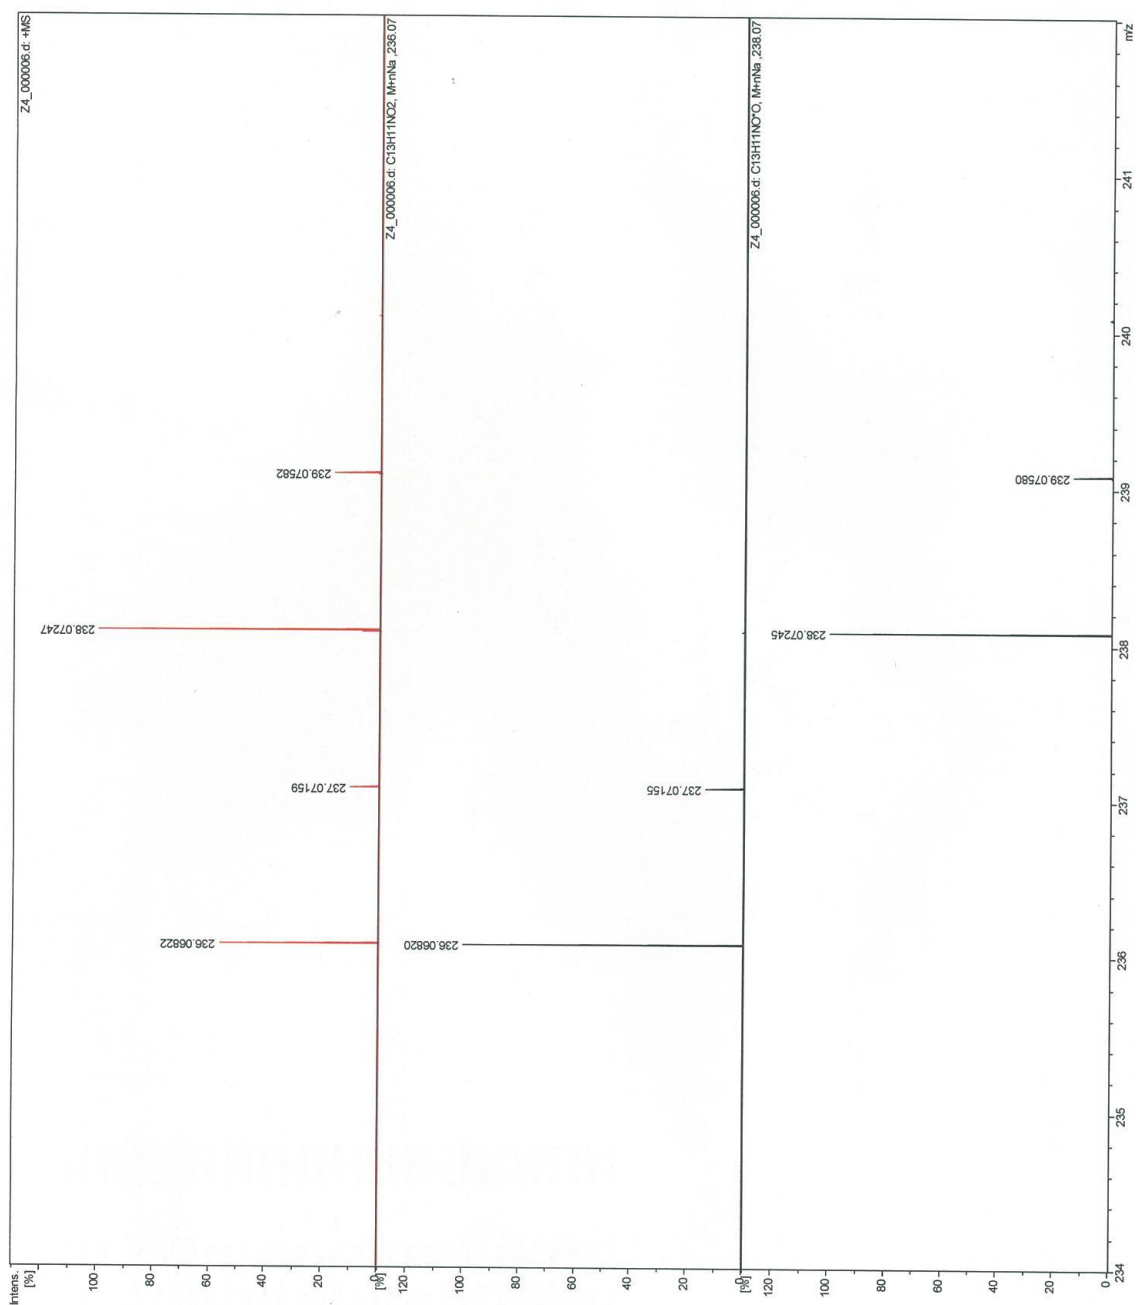

**4h** obtained by the thermal reaction of **1h**-<sup>18</sup>O followed by deprotection

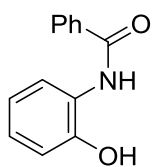

**4h**

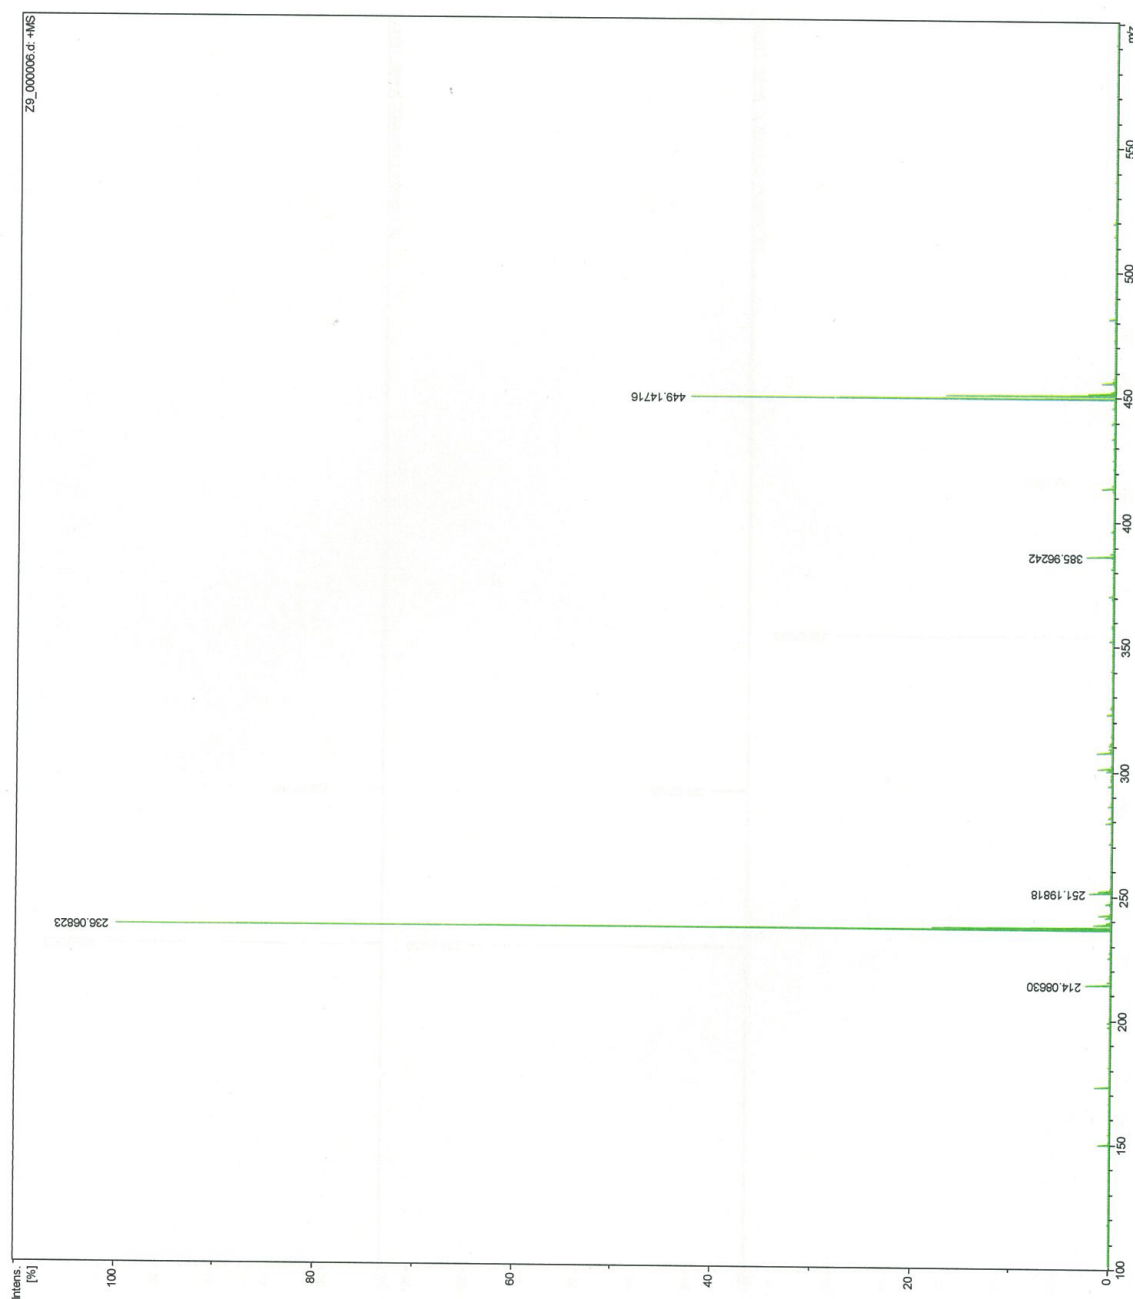





4h-<sup>18</sup>O

m/z(calcd) = 238.0725 (M+Na)<sup>+</sup>



4h

m/z (calcd) = 236.0682 (M+Na)<sup>+</sup>

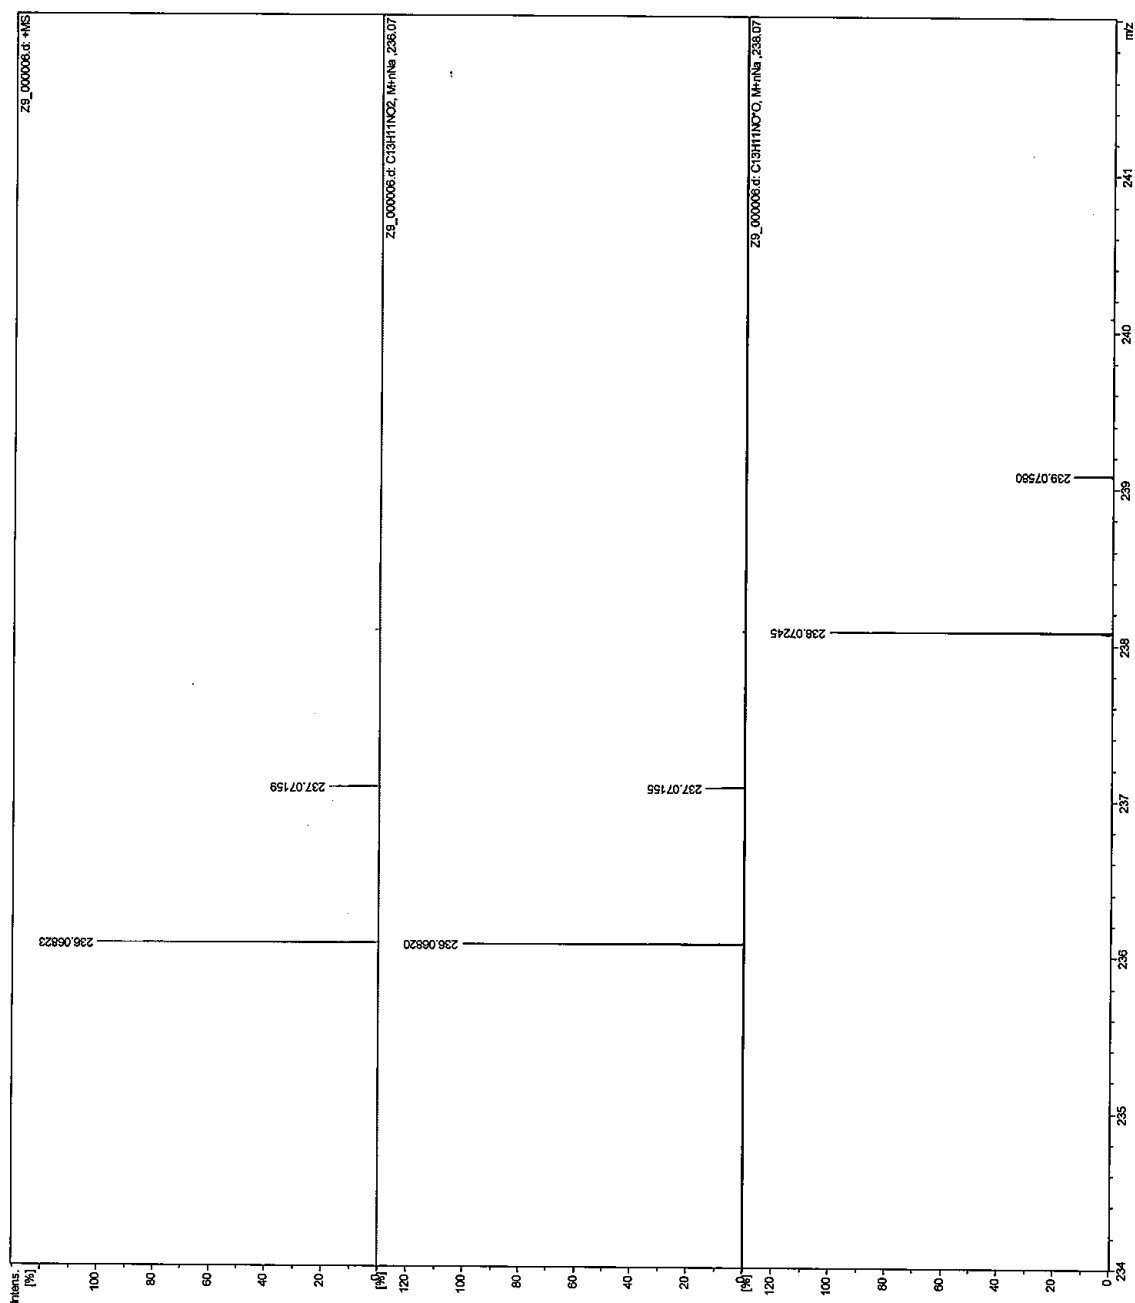

## 6. Analytical data of 1

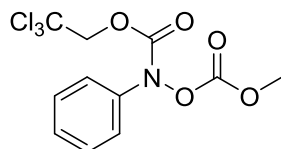

**1e**

***N*-phenyl-*N*-(2,2,2-trichloroethylcarboxyl)-*O*-(methoxycarbonyl)hydroxylamine (1e).**  $^1\text{H}$  NMR (400 MHz,  $\text{CDCl}_3$ )  $\delta$  4.82 (s, 2H), 5.28 (s, 2H), 7.32 (t,  $J = 7.3$  Hz, 1H), 7.37 (s, 5H), 7.41 (t,  $J = 7.3$  Hz, 2H), 7.51 (d,  $J = 7.8$  Hz, 2H).  $^{13}\text{C}$  NMR (100 MHz,  $\text{CDCl}_3$ )  $\delta$  71.84, 75.54, 94.42, 124.29, 128.18, 128.55, 128.71, 129.06, 133.82, 138.42, 151.52, 153.79. IR (neat) 3067, 3035, 2958, 2893, 1794, 1739, 1596, 1493, 1456, 1385, 1341, 1308, 1216, 1159, 1118, 1051, 1030, 954, 901, 827, 795, 772, 752, 735, 717, 694  $\text{cm}^{-1}$ . HRMS (ESI) calcd. for  $(\text{M}+\text{Na})^+$  439.9830, found. 439.9830.

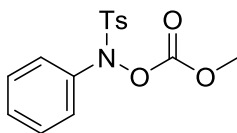

**1j**

***N*-Phenyl-*N*-(4-toluenesulfonyl)-*O*-(methoxycarbonyl)hydroxylamine (1j).**  $^1\text{H}$  NMR (400 MHz,  $\text{CDCl}_3$ )  $\delta$  2.41 (s, 3H), 5.25 (s, 2H), 7.13 (m, 2H), 7.21 (d,  $J = 8.2$  Hz, 2H), 7.25-7.29 (m, 3H), 7.36 (s, 5H), 7.45 (d,  $J = 8.2$  Hz, 2H).  $^{13}\text{C}$  NMR (100 MHz,  $\text{CDCl}_3$ )  $\delta$  21.69, 71.48, 124.00, 128.51, 128.59, 128.65, 128.89, 129.33, 129.43, 129.57, 129.74, 134.05, 139.85, 145.53, 153.03. IR (neat) 3067, 3035, 2959, 1596, 1487, 1455, 1089, 1029, 948, 910, 814, 795, 772, 757, 708, 658  $\text{cm}^{-1}$ . HRMS (ESI) calcd. for  $(\text{M}+\text{Na})^+$  420.0876, found. 420.0876.

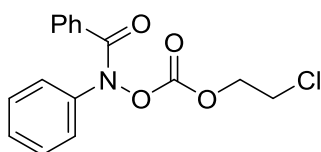

**1l**

***N*-Benzoyl-*N*-phenyl-*O*-(2-chloroethoxycarbonyl)hydroxylamine (1l).**  $^1\text{H}$  NMR (400 MHz,  $\text{CDCl}_3$ )  $\delta$  3.70 (t,  $J = 5.9$  Hz, 2H), 4.48 (t,  $J = 5.9$  Hz, 2H), 7.25-7.34 (m, 7H), 7.38 (t,  $J = 7.5$  Hz, 1H), 7.53 (d,  $J = 7.3$  Hz, 2H).  $^{13}\text{C}$  NMR (100 MHz,  $\text{CDCl}_3$ )  $\delta$  40.65, 68.81, 127.06, 128.17, 128.84, 128.88, 129.28, 131.38, 132.59, 139.97, 153.50, 166.94. IR (neat) 3063, 3027, 2963, 1788, 1678, 1593, 1489, 1448, 1385, 1336, 1306, 1219, 1141, 1075, 993, 915, 846, 768, 694, 661, 611  $\text{cm}^{-1}$ . HRMS (ESI) calcd. for  $(\text{M}+\text{Na})^+$  342.0503, found. 342.0503.

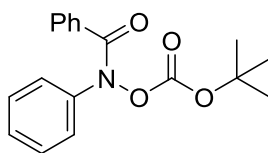

**1m**

***N*-Benzoyl-*N*-phenyl-*O*-(*tert*-butoxycarbonyl)hydroxylamine (1m).**  $^1\text{H}$  NMR (400 MHz,  $\text{CDCl}_3$ )  $\delta$  1.48 (s, 9H), 7.28-7.41 (m, 8H), 7.57 (d,  $J$  = 7.3 Hz, 2H).  $^{13}\text{C}$  NMR (100 MHz,  $\text{CDCl}_3$ )  $\delta$  27.48, 85.89, 125.99, 128.05, 128.14, 128.67, 129.09, 131.03, 133.29, 140.14, 151.62, 167.30. IR (neat) 3453, 3058, 2981, 2932, 1785, 1681, 1592, 1578, 1489, 1452, 1369, 1342, 1296, 1269, 1245, 1141, 1050, 1015, 929, 850, 795, 700  $\text{cm}^{-1}$ . HRMS (ESI) calcd. for  $(\text{M}+\text{Na})^+$  336.1206, found. 336.1206.

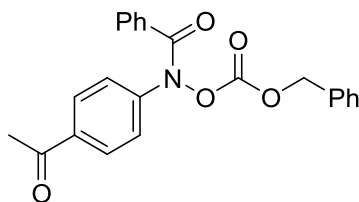

**1w**

***N*-Benzoyl-*N*-(4-acetylphenyl)-*O*-(benzyloxycarbonyl)hydroxylamine (1w).**  $^1\text{H}$  NMR (400 MHz,  $\text{CDCl}_3$ )  $\delta$  2.58 (s, 3H), 5.24 (s, 2H), 7.28-7.38 (m, 7H), 7.42-7.46 (m, 3H), 7.55-7.57 (m, 2H), 7.92 (d,  $J$  = 9.2 Hz, 2H).  $^{13}\text{C}$  NMR (100 MHz,  $\text{CDCl}_3$ )  $\delta$  26.59, 71.86, 123.92, 128.32, 128.36, 128.56, 128.69, 129.00, 129.25, 131.67, 132.62, 133.71, 135.53, 143.70, 153.64, 167.23, 196.74. IR (neat) 3350, 3065, 3031, 3011, 2965, 2921, 1790, 1682, 1599, 1504, 1448, 1416, 1358, 1326, 1297, 1266, 1218, 1147, 1054, 958, 899, 836, 768, 697, 658  $\text{cm}^{-1}$ . HRMS (ESI) calcd. for  $(\text{M}+\text{Na})^+$  412.1155, found. 412.1155.

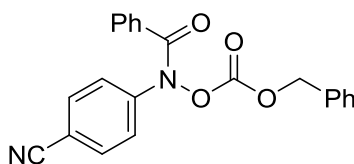

**1x**

***N*-Benzoyl-*N*-(4-cyanophenyl)-*O*-(benzyloxycarbonyl)hydroxylamine (1x).**  $^1\text{H}$  NMR (400 MHz,  $\text{CDCl}_3$ )  $\delta$  5.21 (s, 2H), 7.24-7.26 (m, 2H), 7.32-7.40 (m, 5H), 7.45-7.57 (m, 5H), 7.64 (d,  $J$  = 8.7 Hz, 2H).  $^{13}\text{C}$  NMR (150 MHz,  $\text{CDCl}_3$ )  $\delta$  72.08, 110.43, 118.02, 123.26, 128.37(br s), 128.39, 128.69, 129.08, 131.84, 132.36, 132.96, 133.52, 143.38, 153.47, 167.51. IR (neat) 3900, 3845, 3794, 3666, 3416, 3213, 3202, 3066, 3042, 2229, 1793, 1687, 1602, 1502, 1447, 1414, 1329, 1301, 1263, 1220, 1142, 1050, 898, 833, 696  $\text{cm}^{-1}$ . HRMS (ESI) calcd. for  $(\text{M}+\text{Na})^+$  395.1002, found. 395.1002.

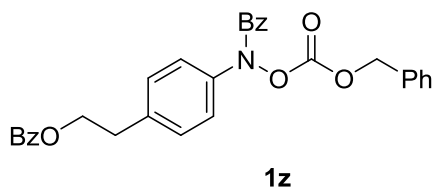

**4-(N-(((Benzyloxy)carbonyl)oxy)benzamido)phenethyl benzoate (1z).**  $^1\text{H}$  NMR (400 MHz,  $\text{CDCl}_3$ )  $\delta$  3.05 (t,  $J$  = 6.9 Hz, 2H), 4.50 (t,  $J$  = 6.9 Hz, 2H), 5.25 (s, 2H), 7.59-7.21 (m, 17H), 7.97 (d,  $J$  = 7.3 Hz, 2H).  $^{13}\text{C}$  NMR (100 MHz,  $\text{CDCl}_3$ )  $\delta$  34.79, 64.88, 71.51, 127.01, 128.12, 128.34, 128.40, 128.68, 128.77, 128.86, 129.53, 129.62, 130.05, 131.24, 132.89, 133.04, 134.08, 138.64, 138.85, 153.86, 166.41, 167.16. IR (neat) 3034, 2957, 2896, 2359, 2341, 1788, 1716, 1682, 1602, 1509, 1450, 1379, 1336, 1314, 1178, 1115, 1070, 1026, 968, 901, 843, 789, 739, 713, 698, 615  $\text{cm}^{-1}$ . HRMS (ESI) calcd. for  $(\text{M}+\text{Na})^+$  518.1574, found. 518.1574.

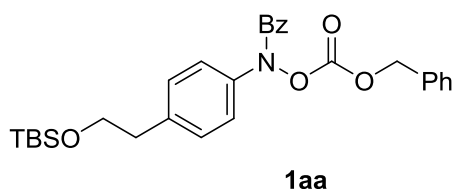

**N-Benzoyl-N-[4-{2-(tert-butyldimethylsilyloxy)ethyl}phenyl]-O-(benzyloxycarbonyl)hydroxylamine (1aa).**  $^1\text{H}$  NMR (400 MHz,  $\text{CDCl}_3$ )  $\delta$  -0.08 (s, 6H), 0.83 (s, 9H), 2.77 (t, 2H), 3.76 (t, 2H), 5.26 (s, 2H), 7.15 (d, 2H), 7.24-7.27 (m, 6H), 7.35-7.38 (m, 6H), 7.53 (d, 2H).  $^{13}\text{C}$  NMR (100 MHz,  $\text{CDCl}_3$ ) -5.49, 18.22, 25.83, 39.00, 63.81, 71.36, 126.88, 128.09, 128.28, 128.62, 128.78, 130.00, 131.12, 132.99, 134.12, 138.20, 140.49, 153.81, 167.12. IR (neat) 3416, 3370, 3064, 3033, 2952, 2928, 2886, 2856, 1788, 1682, 1602, 1579, 1508, 1471, 1462, 1448, 1379, 1334, 1253, 1215, 1179, 1094, 1040, 1004, 966, 916, 901, 832, 774, 736, 695  $\text{cm}^{-1}$ . HRMS (ESI) calcd. for  $(\text{M}+\text{Na})^+$  528.2177, found. 528.2177.

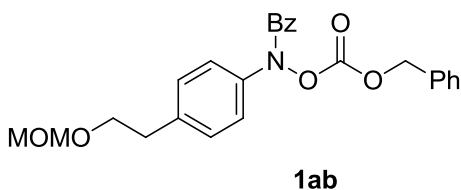

**N-Benzoyl-N-[4-{2-(methoxymethoxy)ethyl}phenyl]-O-(benzyloxycarbonyl)hydroxylamine (1ab).** (a mixture with 2ab (8.3 : 1)  $^1\text{H}$  NMR (400 MHz,  $\text{CDCl}_3$ )  $\delta$  2.87 (t,  $J$  = 6.9 Hz, 2H), 3.22 (s, 3H), 3.72 (t,  $J$  = 6.9 Hz, 2H), 4.57 (s, 2H), 5.25 (s, 2H), 7.18-7.20 (m, 2H), 7.23-7.28 (m, 4H), 7.32-7.38 (m, 6H), 7.52-7.55 (m, 2H).  $^{13}\text{C}$  NMR (100 MHz,  $\text{CDCl}_3$ )  $\delta$  35.83, 55.17, 67.80, 71.44, 96.30, 127.02, 128.10, 128.33, 128.56, 128.66, 128.78, 128.84, 129.72, 131.17, 133.00, 134.10, 138.29, 140.11, 153.85. IR (neat) 3062, 3034, 2931, 2883, 2823, 1787, 1681, 1509, 1448, 1379, 1335, 1218, 1147, 1108, 1068, 1030, 965, 915, 845, 795, 770, 740, 698  $\text{cm}^{-1}$ . HRMS (ESI) calcd. for  $(\text{M}+\text{Na})^+$  458.1574, found. 458.1574.

## 7. Analytical data of 2

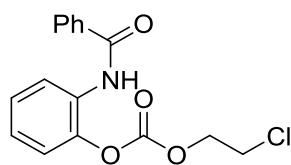

**2l**

**2-[(Benzoyl)amino]phenyl 2-chloroethyl carbonate (2l).**  $^1\text{H}$  NMR (400 MHz,  $\text{CDCl}_3$ )  $\delta$  3.79 (t,  $J$  = 5.5 Hz, 2H), 4.55 (t,  $J$  = 5.5 Hz, 2H), 7.18 (t,  $J$  = 7.8 Hz, 1H), 7.31-7.34 (m, 2H), 7.51 (t,  $J$  = 7.3 Hz, 2H), 7.58 (t,  $J$  = 7.3 Hz, 1H), 7.89 (d,  $J$  = 7.3 Hz, 2H), 8.12 (br s, 1H), 8.42 (d,  $J$  = 8.2 Hz, 1H).  $^{13}\text{C}$  NMR (100 MHz,  $\text{CDCl}_3$ )  $\delta$  41.17, 68.25, 121.40, 122.32, 124.60, 126.90, 127.08, 128.84, 129.73, 132.10, 134.37, 140.62, 152.48, 165.31. IR (neat) 3317, 3065, 2959, 1767, 1667, 1608, 1580, 1523, 1496, 1454, 1386, 1309, 1235, 1190, 1125, 1082, 1033, 998, 766, 740, 709  $\text{cm}^{-1}$ . HRMS (ESI) calcd. for  $(\text{M}+\text{Na})^+$  342.0503, found. 342.0503.

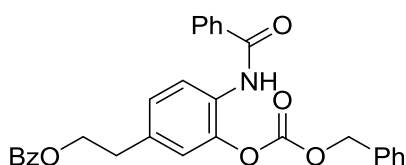

**2z**

**4-Benzamido-3-(((benzyloxy)carbonyl)oxy)phenethyl benzoate (2z).** Included with inseparable byproducts  $^1\text{H}$  NMR (400 MHz,  $\text{CDCl}_3$ )  $\delta$  3.07 (t,  $J$  = 6.9 Hz, 2H), 4.52 (t,  $J$  = 6.9 Hz, 2H), 5.28 (s, 2H), 7.20-8.03 (m, 17H), 8.32 (d,  $J$  = 8.7 Hz, 1H). Reaction mixture was not purified by flash chromatography (Silica gel, hexanes:EtOAc = 3:1). Isolation of **2z** was unsuccessful due to contamination by inseparable byproducts; further purification by using gel permeation chromatography resulted in decomposition of the product.

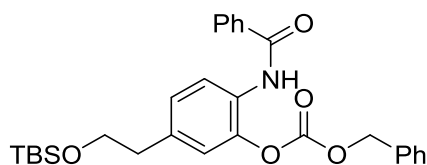

**2aa**

**2-[(Benzoyl)amino]-4-[2-(tert-butyldimethylsiloxy)ethyl]phenyl 2-benzyl carbonate (2aa).**  $^1\text{H}$  NMR (400 MHz,  $\text{CDCl}_3$ ) -0.01 (s, 6H), 0.90 (s, 9H), 2.83 (t, 2H), 3.82 (t, 2H), 5.29 (s, 2H), 7.15 (d, 2H), 7.35-7.37 (m, 3H), 7.42-7.45 (m, 4H), 7.78 (d, 2H), 8.04 (s, 1H), 8.26 (d, 1H).  $^{13}\text{C}$  NMR (100 MHz,  $\text{CDCl}_3$ ) -5.45, 18.28, 25.89, 38.86, 64.02, 70.82, 122.02, 122.34, 127.00, 127.45, 127.79, 128.51, 128.73, 128.76, 128.94, 131.86, 134.43, 134.56, 136.43, 140.89, 152.84, 165.19. IR (neat) 3444, 3314, 3065, 3033, 2952, 2928, 2895, 2856, 2737,

1766, 1679, 1601, 1520, 1481, 1421, 1379, 1312, 1208, 1130, 1093, 1045, 1028, 1005, 930, 908, 831, 774, 695  $\text{cm}^{-1}$ . HRMS (ESI) calcd. for  $(\text{M}+\text{Na})^+$  528.2177, found. 528.2177.

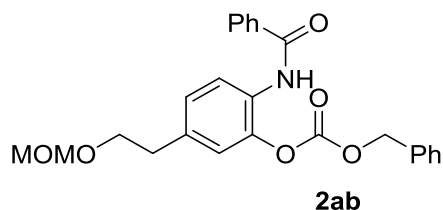

**2-[(Benzoyl)amino]-4-[2-(methoxymethoxy)ethyl]phenyl 2-benzyl carbonate (2ab).**  $^1\text{H}$  NMR (400 MHz,  $\text{CDCl}_3$ )  $\delta$  2.90 (t,  $J$  = 6.9 Hz, 2H), 3.29 (s, 3H), 3.75 (t,  $J$  = 6.9 Hz, 2H), 4.63 (s, 2H), 5.28 (s, 2H), 7.17 (d,  $J$  = 9.6 Hz, 2H), 7.35-7.45 (m, 8H), 7.54 (t,  $J$  = 7.3 Hz, 1H), 7.77 (d,  $J$  = 7.3 Hz, 2H), 8.02 (br s, 1H), 8.26 (d,  $J$  = 8.2 Hz, 1H).  $^{13}\text{C}$  NMR (100 MHz,  $\text{CDCl}_3$ )  $\delta$  35.59, 55.17, 67.94, 70.82, 96.31, 121.79, 122.40, 126.98, 127.15, 128.87, 128.51, 128.71, 128.75, 128.93, 131.34, 134.47, 136.03, 140.89, 152.80. IR (neat) 3323, 3062, 3033, 2934, 2884, 2824, 1766, 1675, 1602, 1581, 1521, 1483, 1421, 1380, 1311, 1234, 1212, 1147, 1108, 1070, 1029, 914, 795, 746, 697  $\text{cm}^{-1}$ . HRMS (ESI) calcd. for  $(\text{M}+\text{Na})^+$  458.1574, found. 458.1574.

## 8. Analytical data of 3

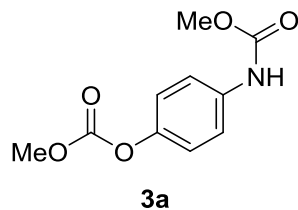

**4-[(Methoxycarbonyl)amino]phenyl methyl carbonate (3a)**  $^1\text{H}$  NMR (400 MHz,  $\text{CDCl}_3$ )  $\delta$  3.77 (s, 3H), 3.90 (s, 3H), 6.79 (br s, 1H), 7.09-7.12 (m, 2H), 7.39 (d,  $J = 8.2$  Hz, 2H).  $^{13}\text{C}$  NMR (100 MHz,  $\text{CDCl}_3$ )  $\delta$  52.40, 55.41, 119.38, 121.53, 135.73, 146.59, 153.94, 154.43. IR (neat) 3628, 3540, 3367, 3348, 3134, 3011, 2956, 2851, 1764, 1734, 1713, 1610, 1540, 1512, 1440, 1411, 1265, 1209, 1113, 1071, 1016, 948, 930, 839, 806, 771  $\text{cm}^{-1}$ . HRMS (ESI) calcd. for  $(\text{M}+\text{Na})^+$  248.0529, found. 248.0529.

## 9. $^1\text{H}$ and $^{13}\text{C}$ NMR chart of 1, 2, 3 and 4

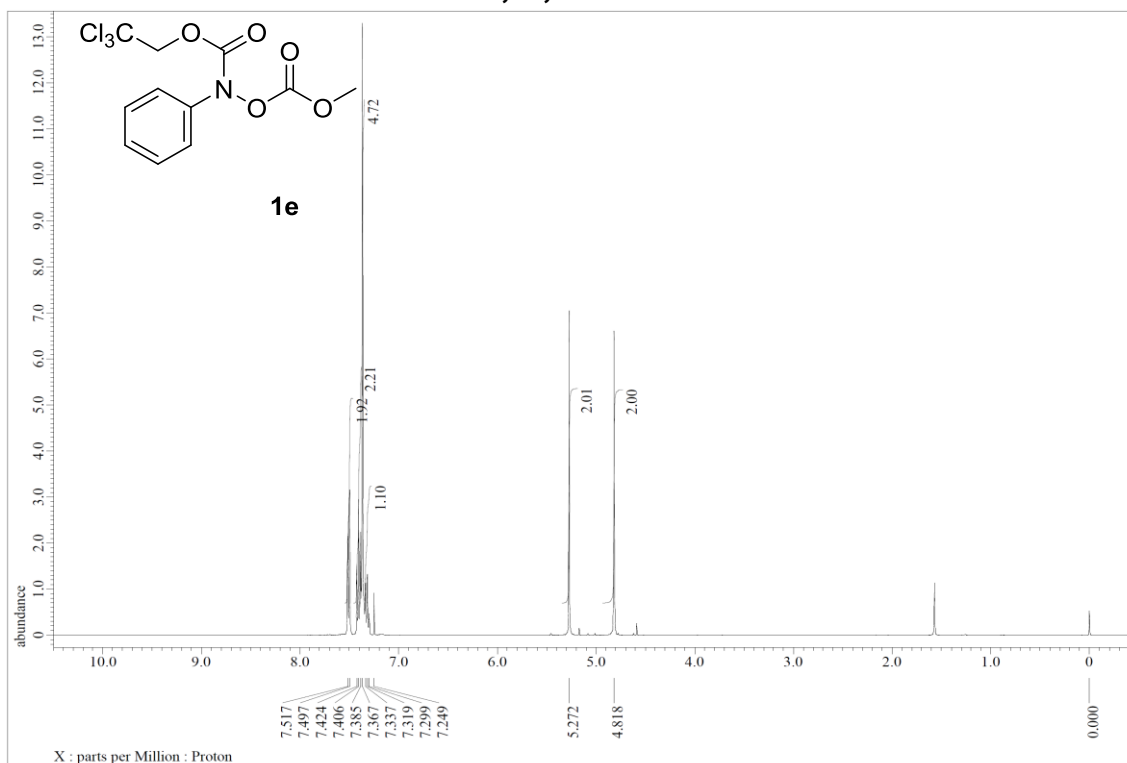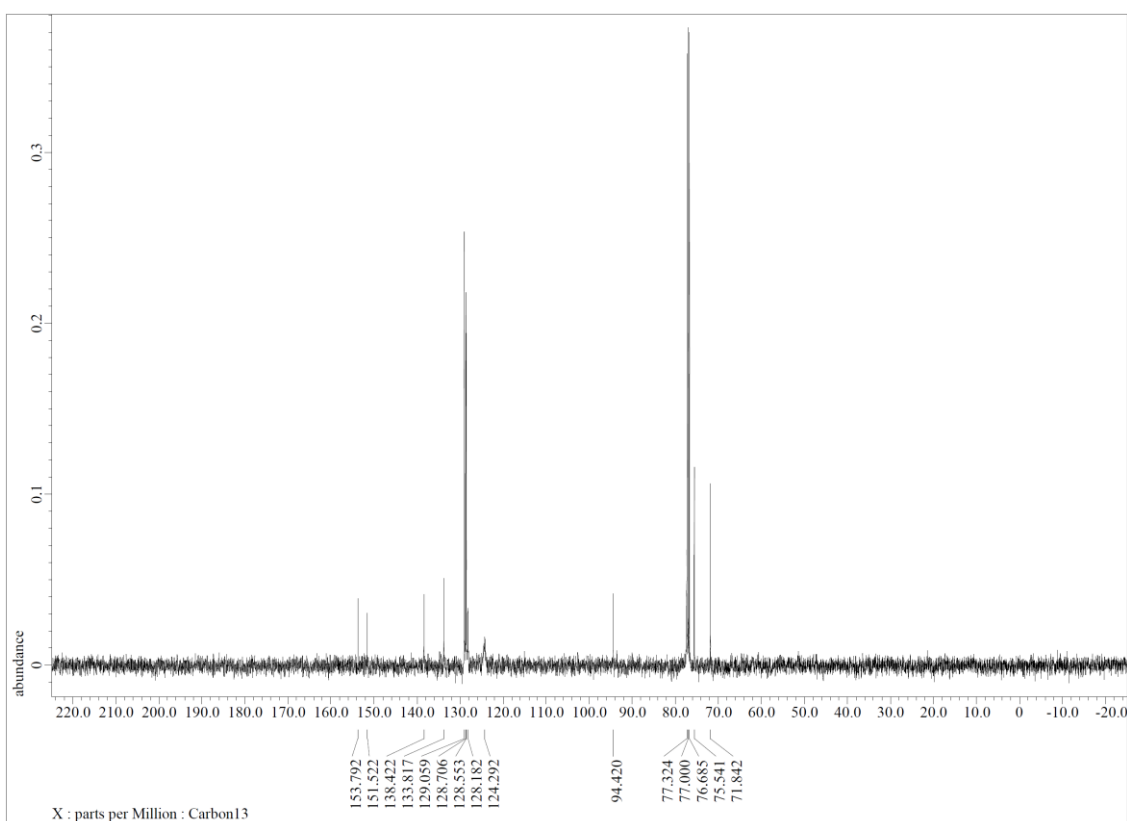



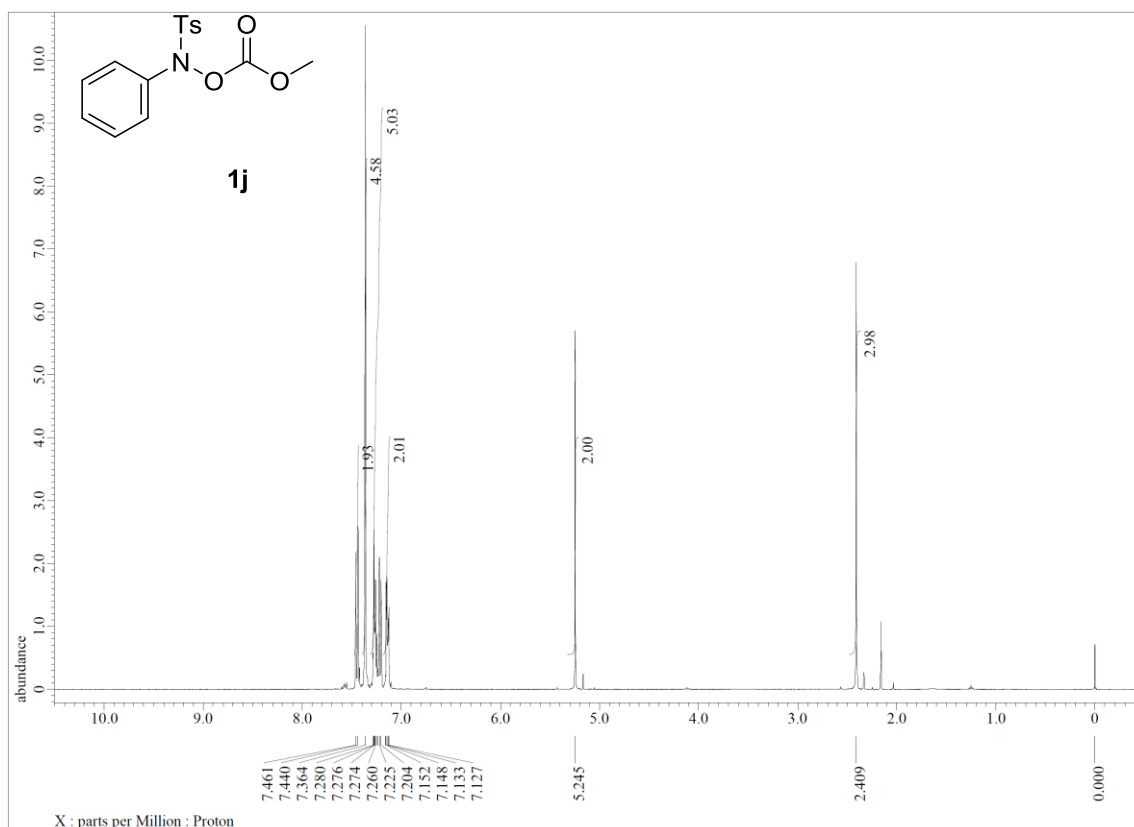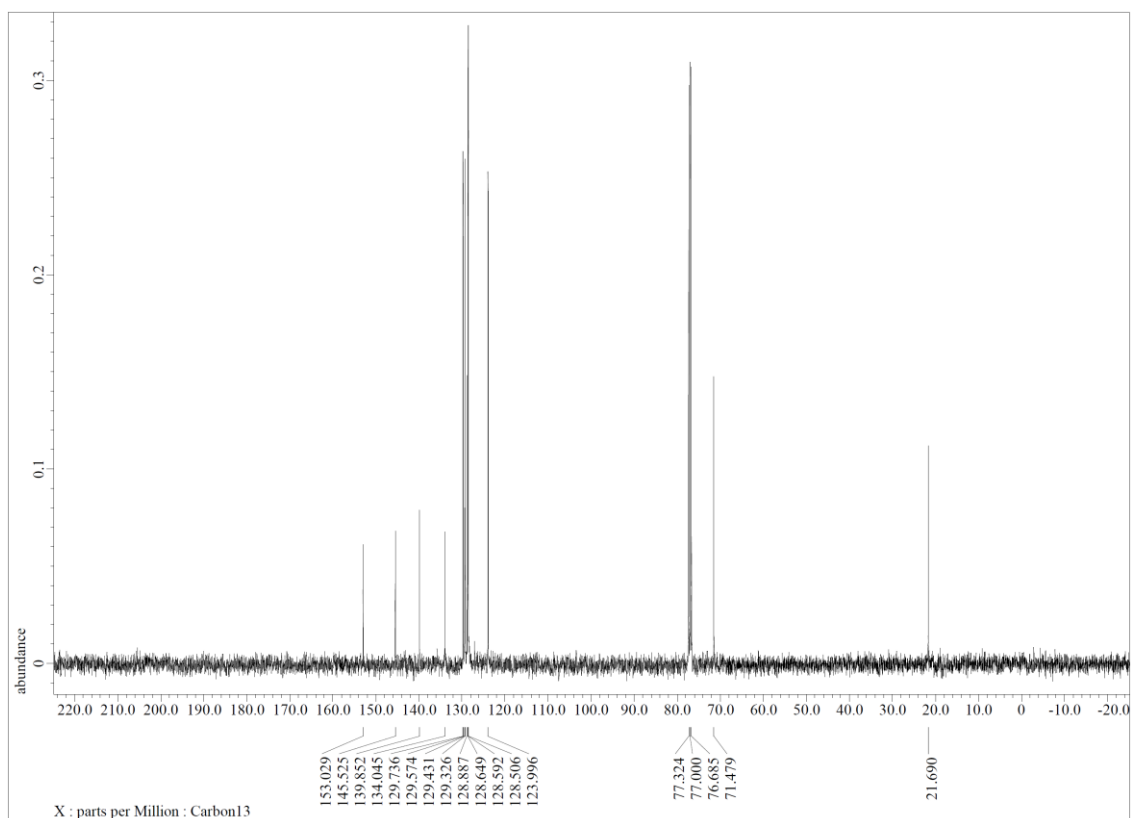

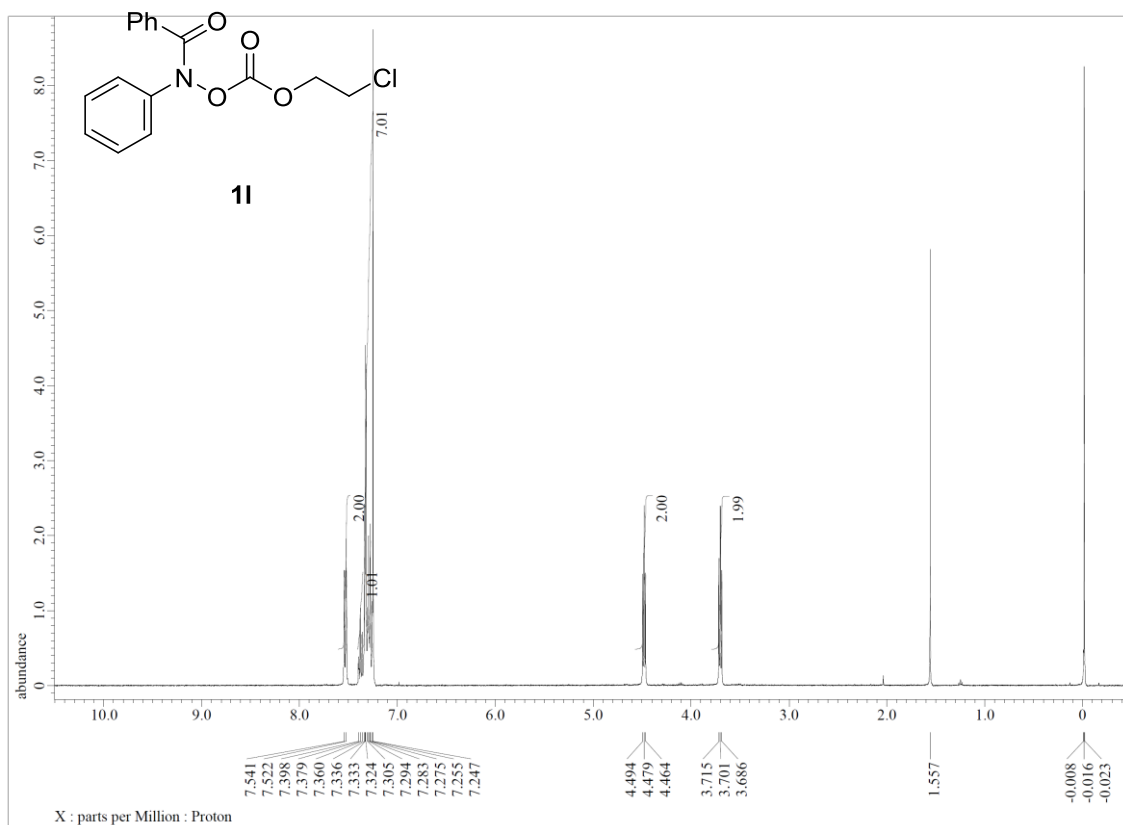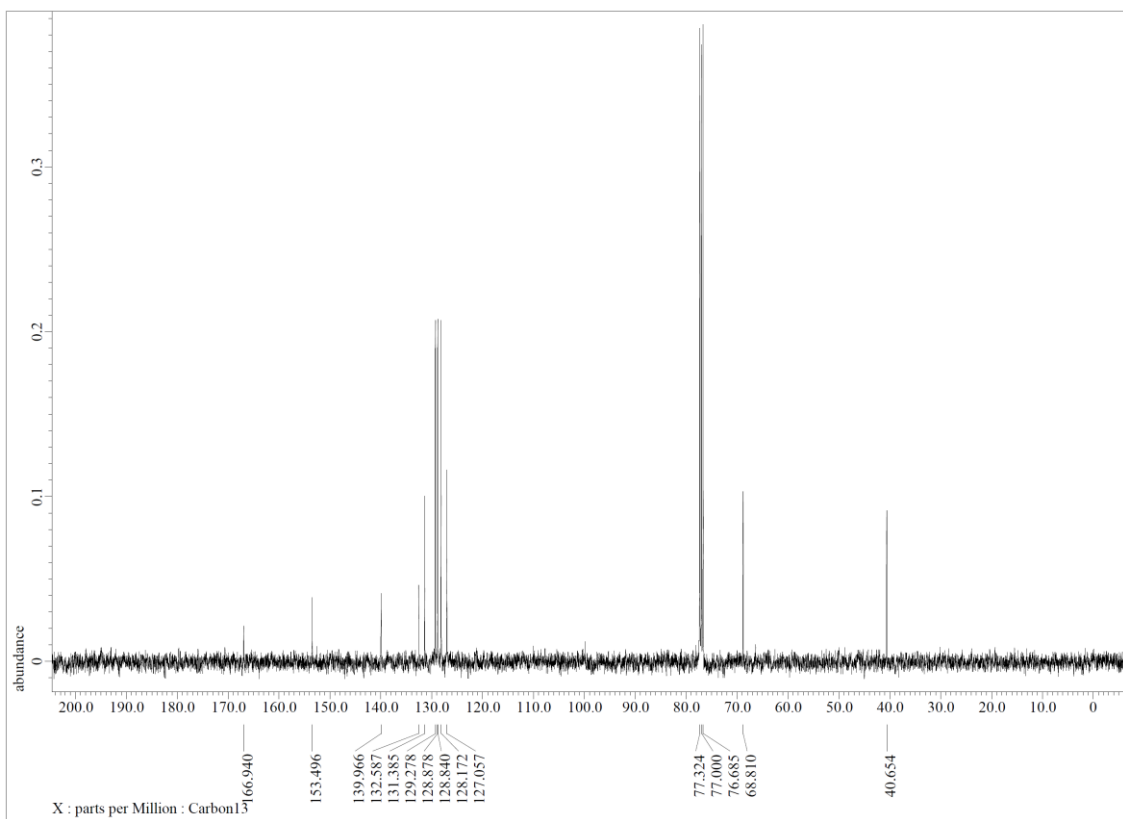

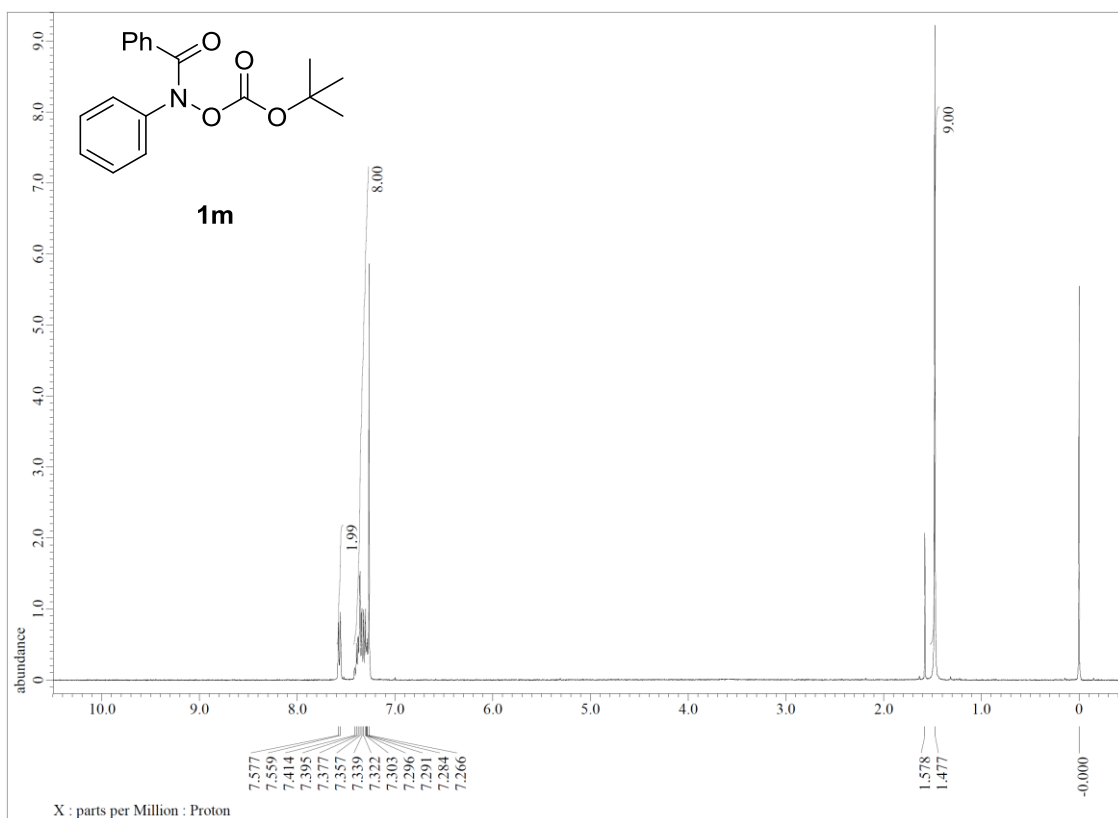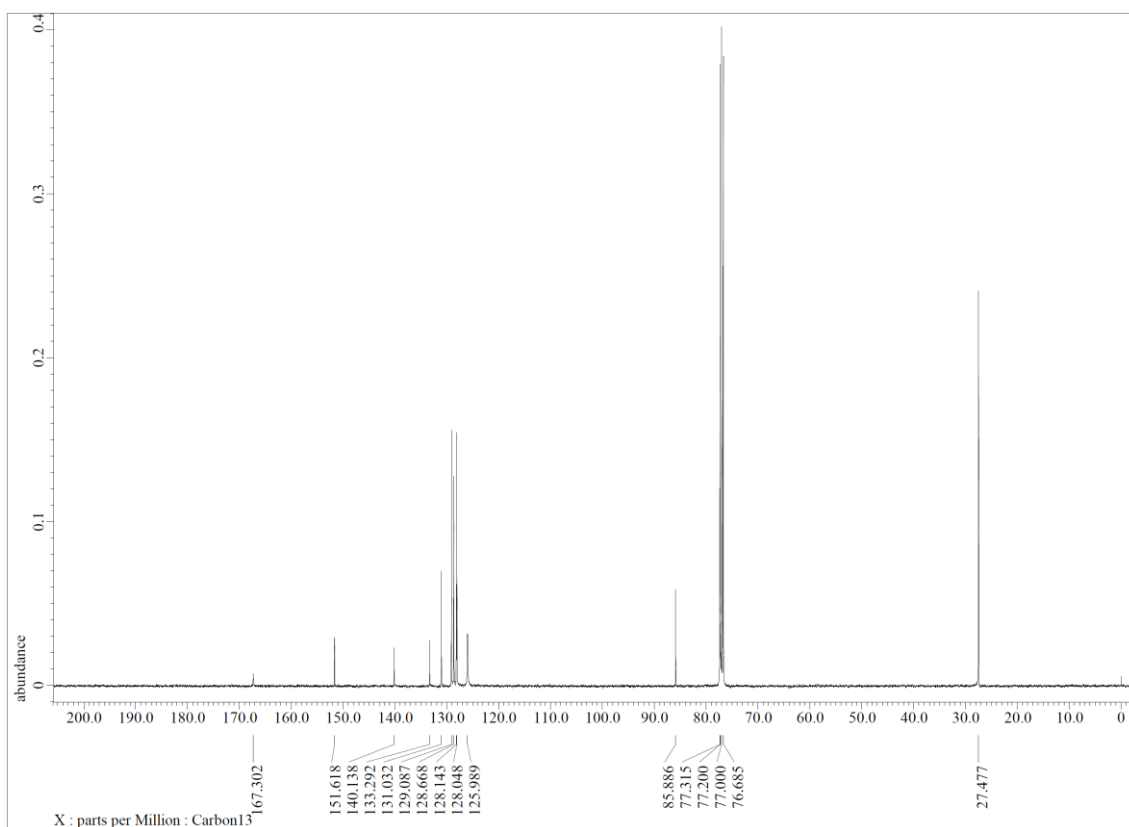

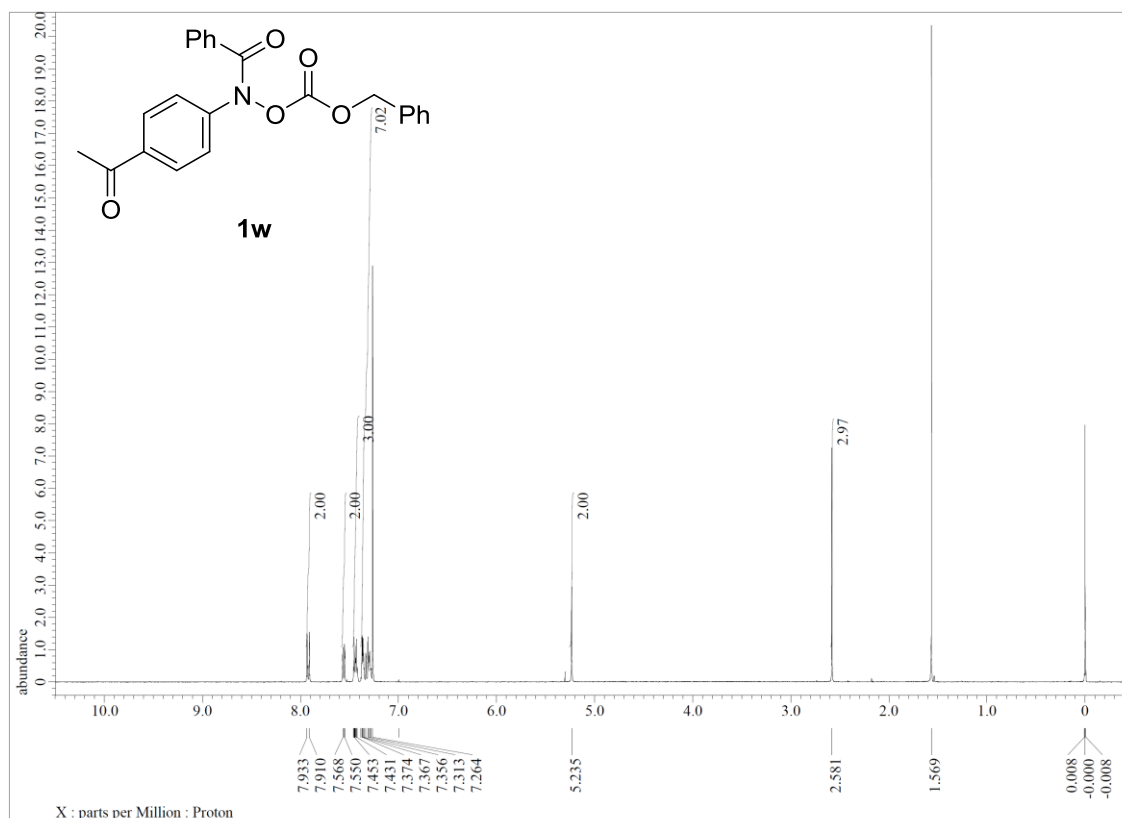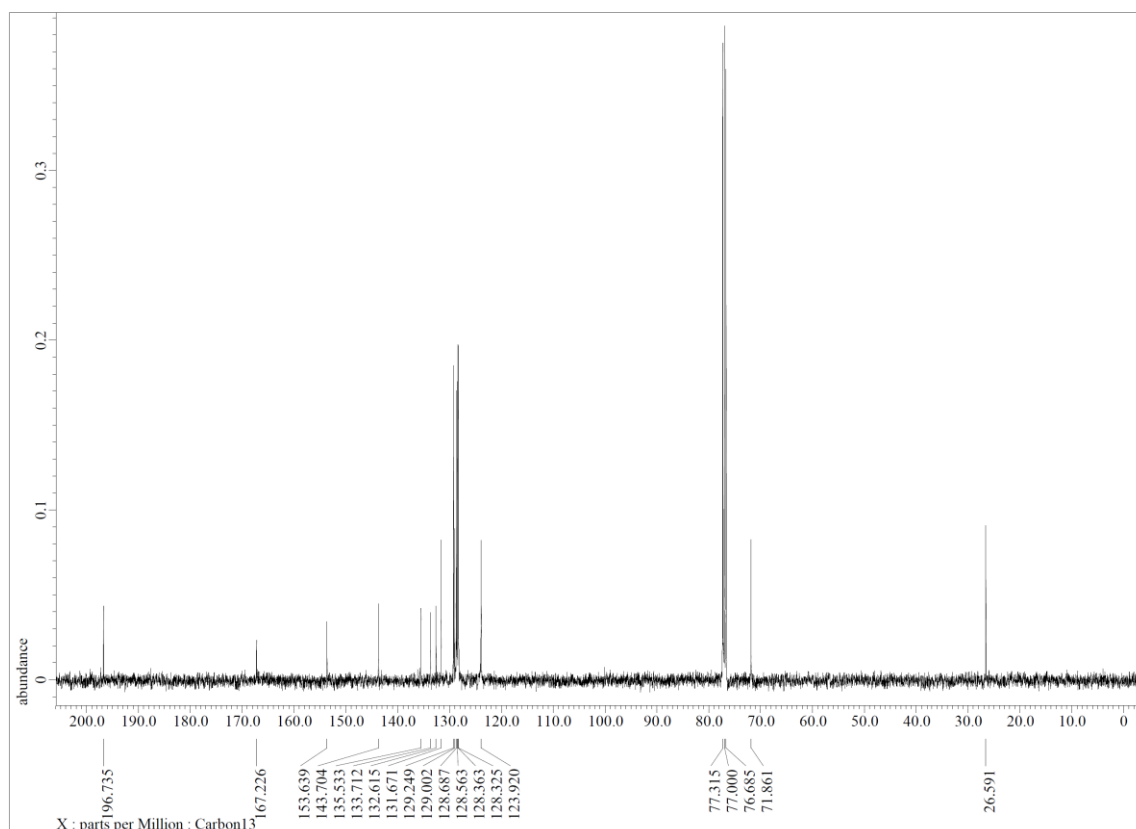

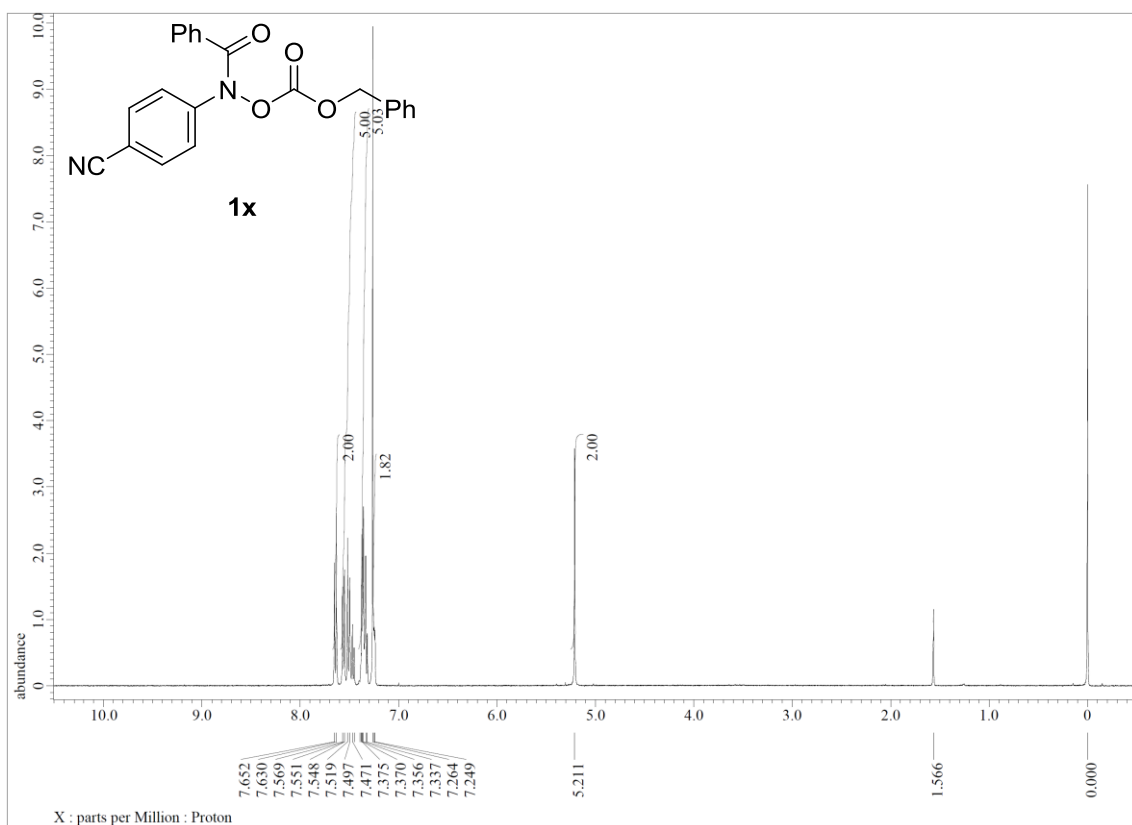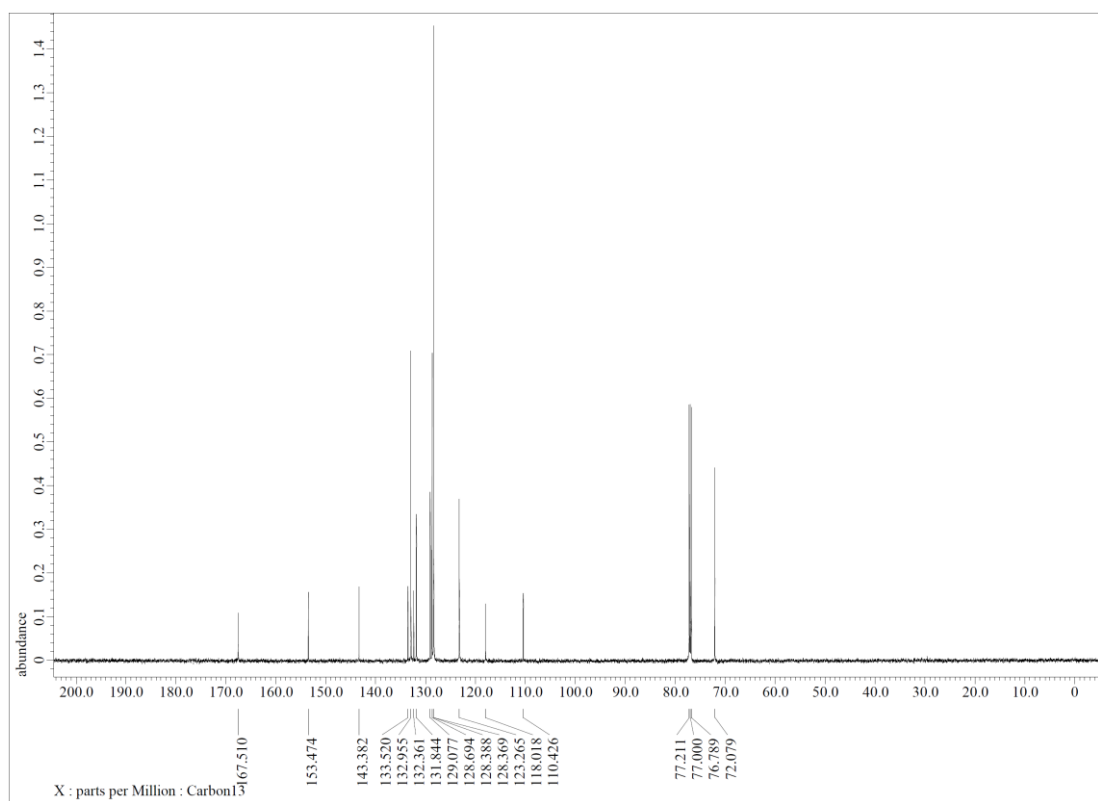

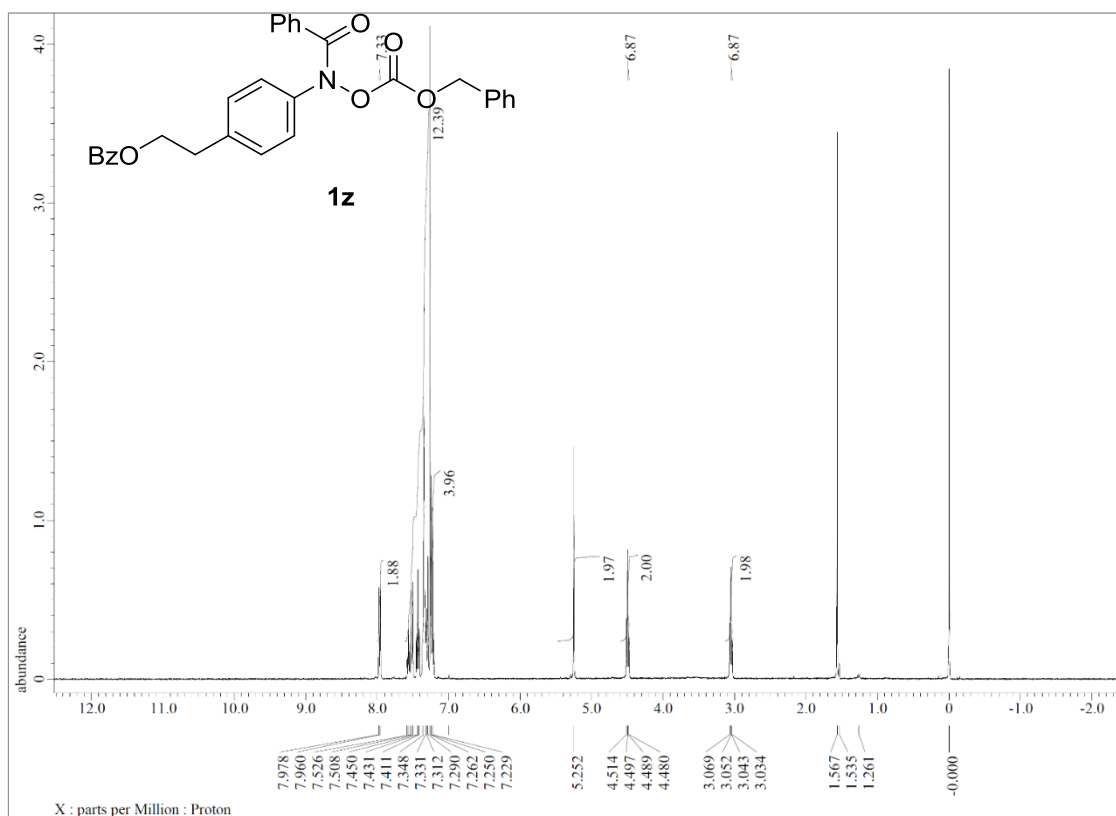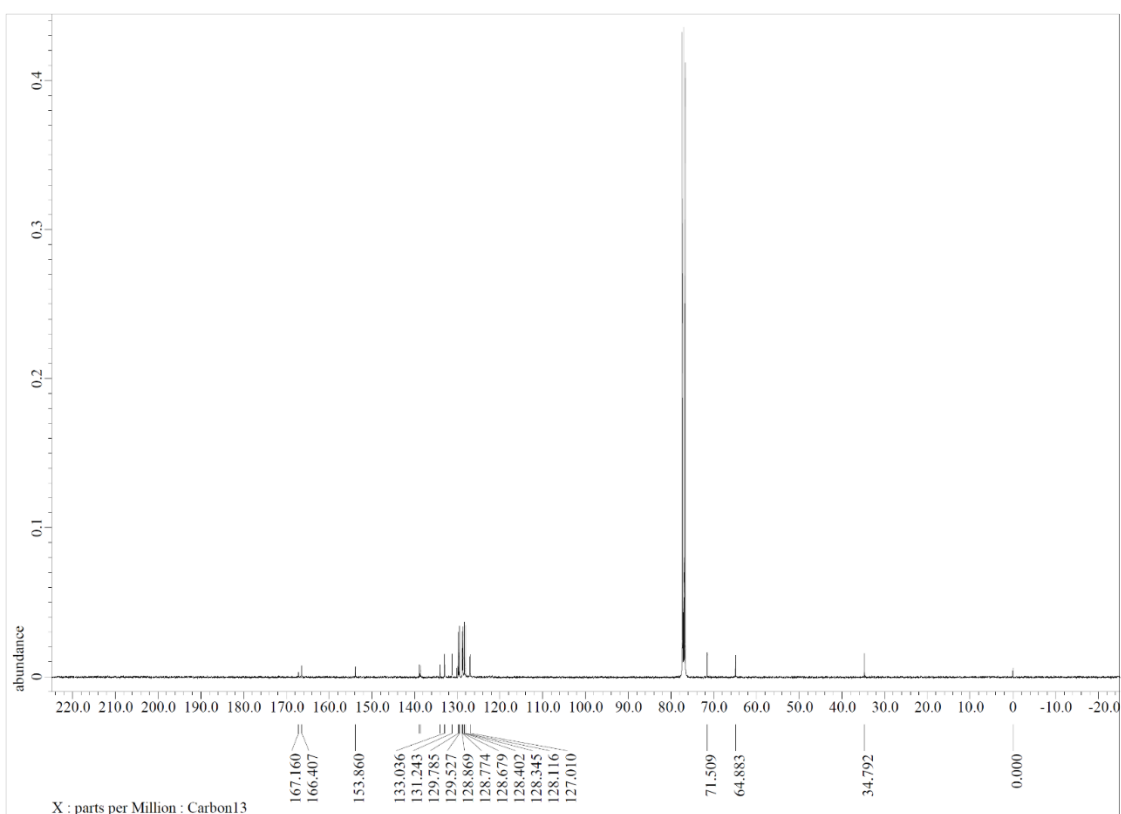

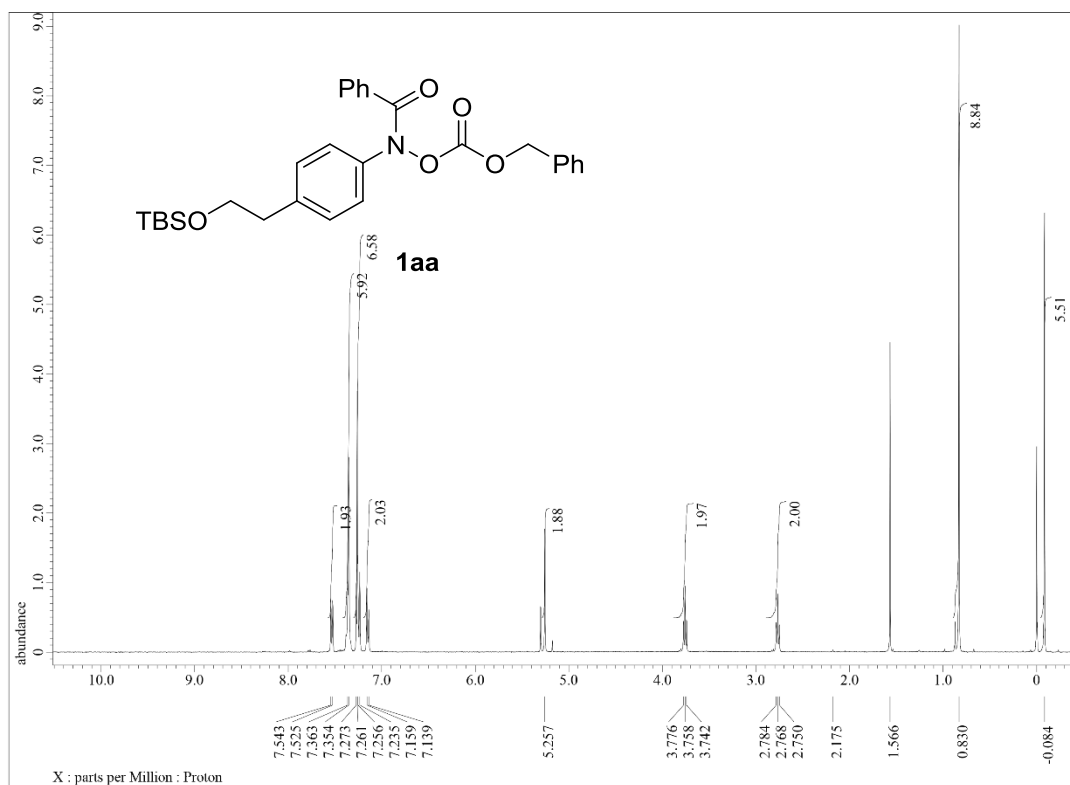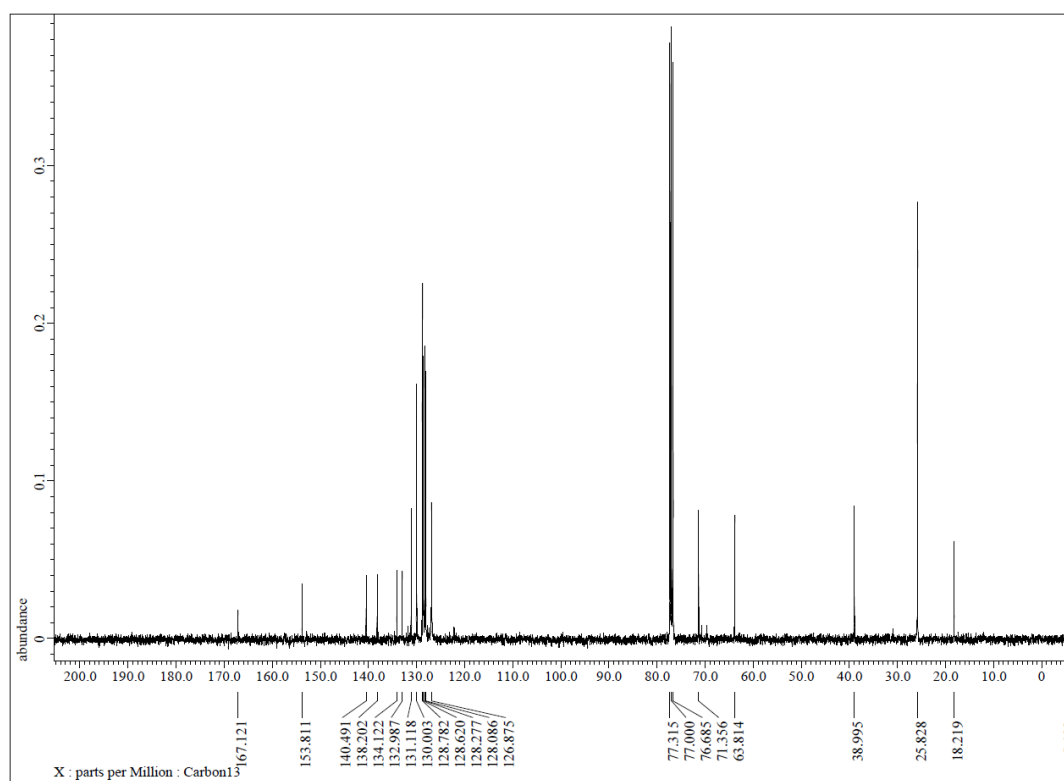

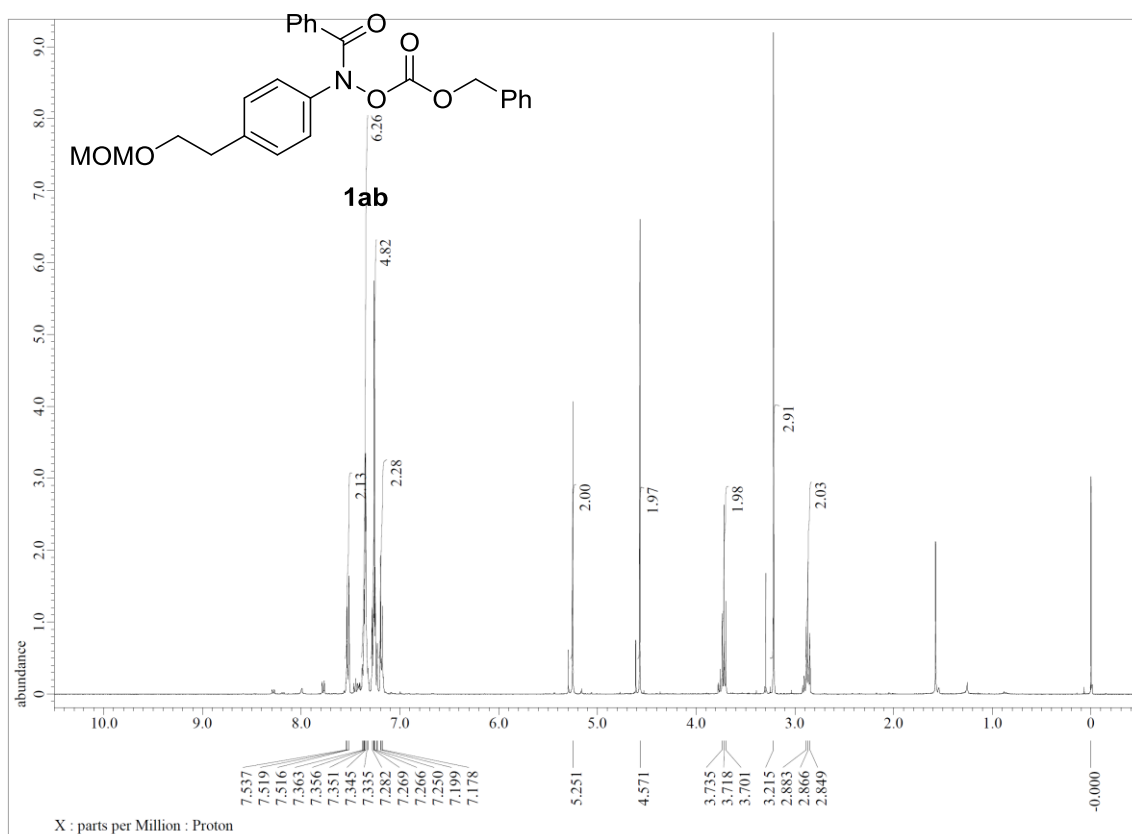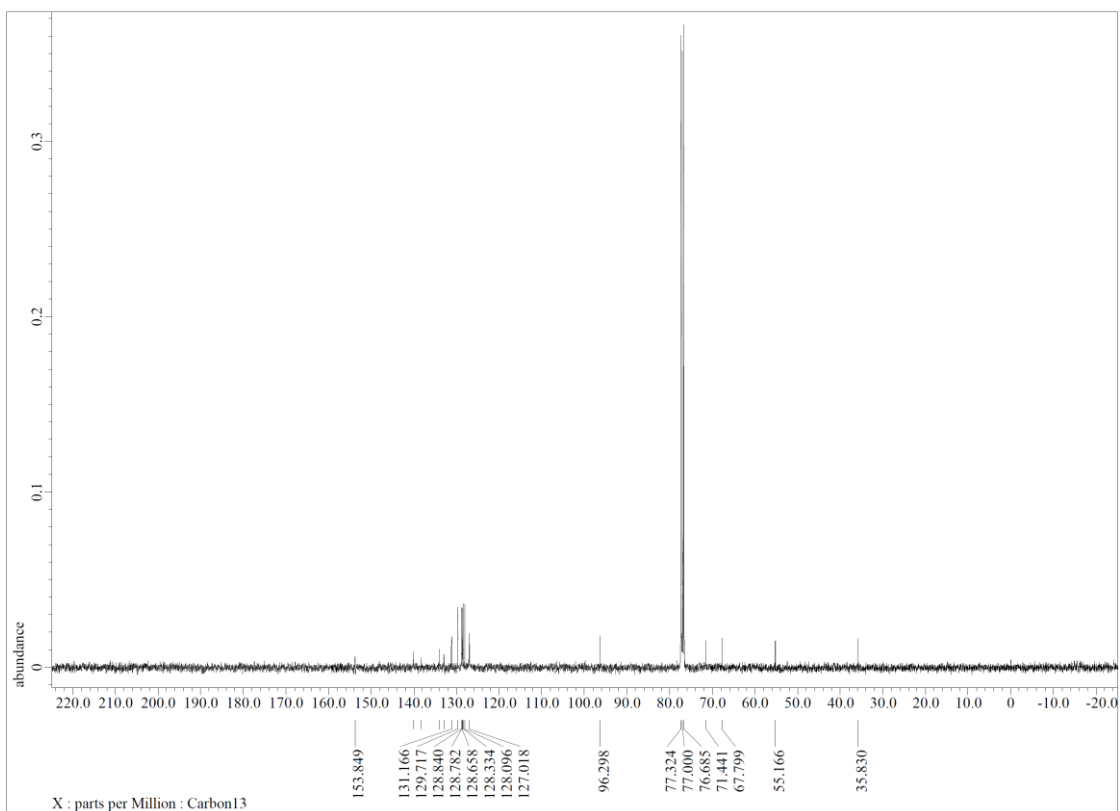



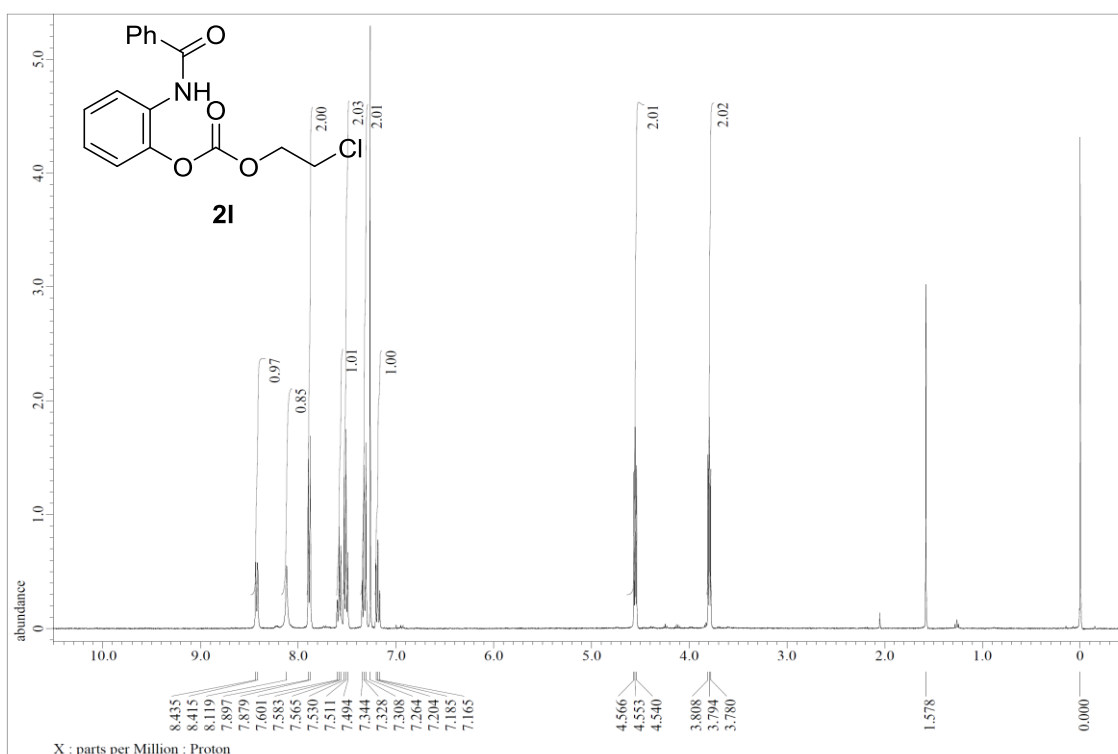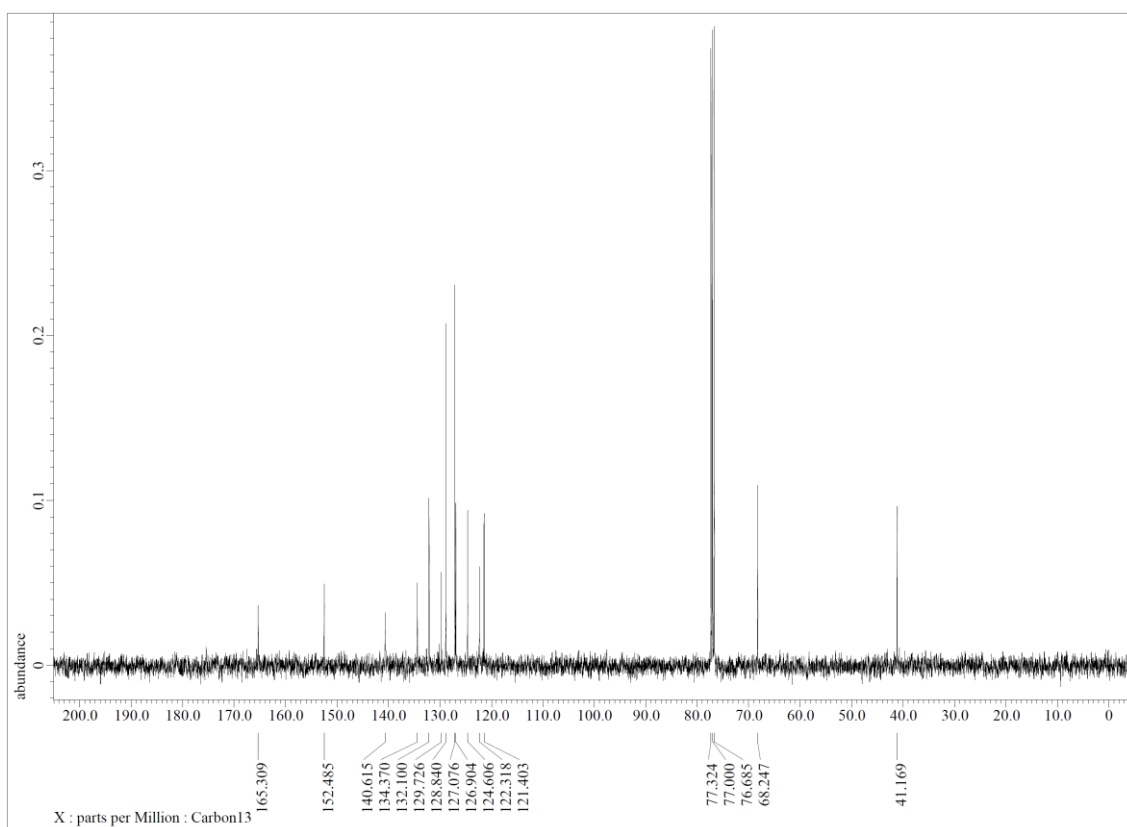

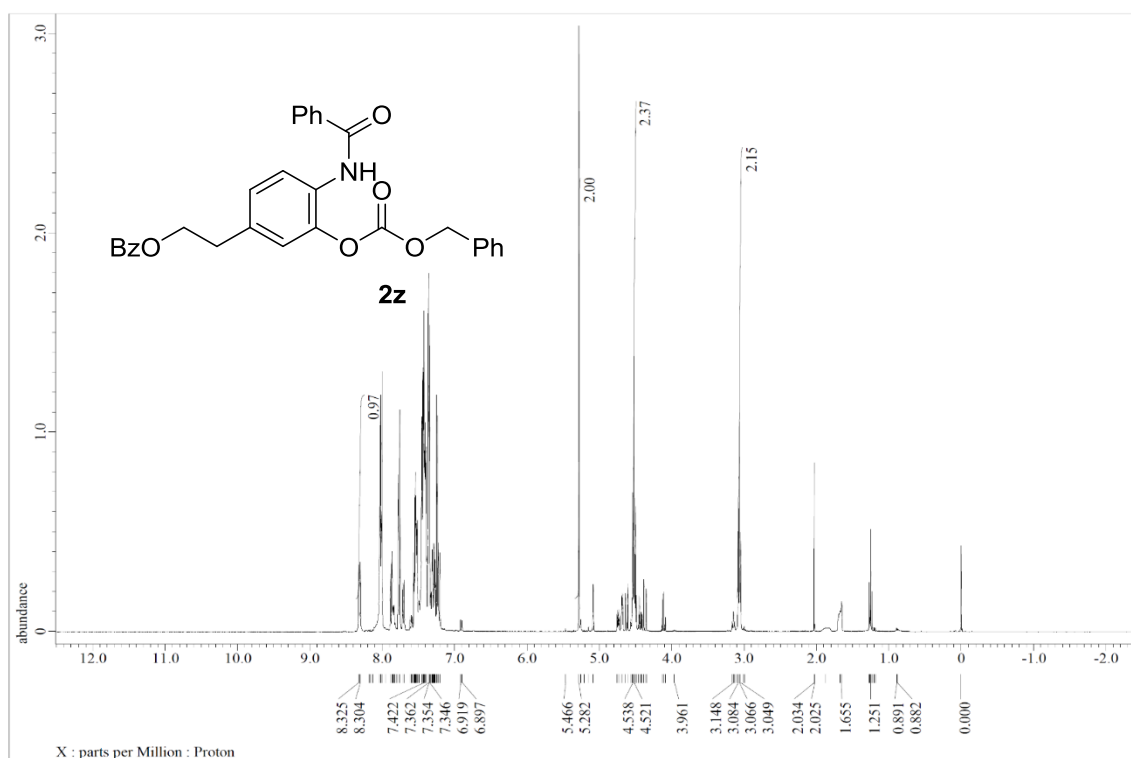

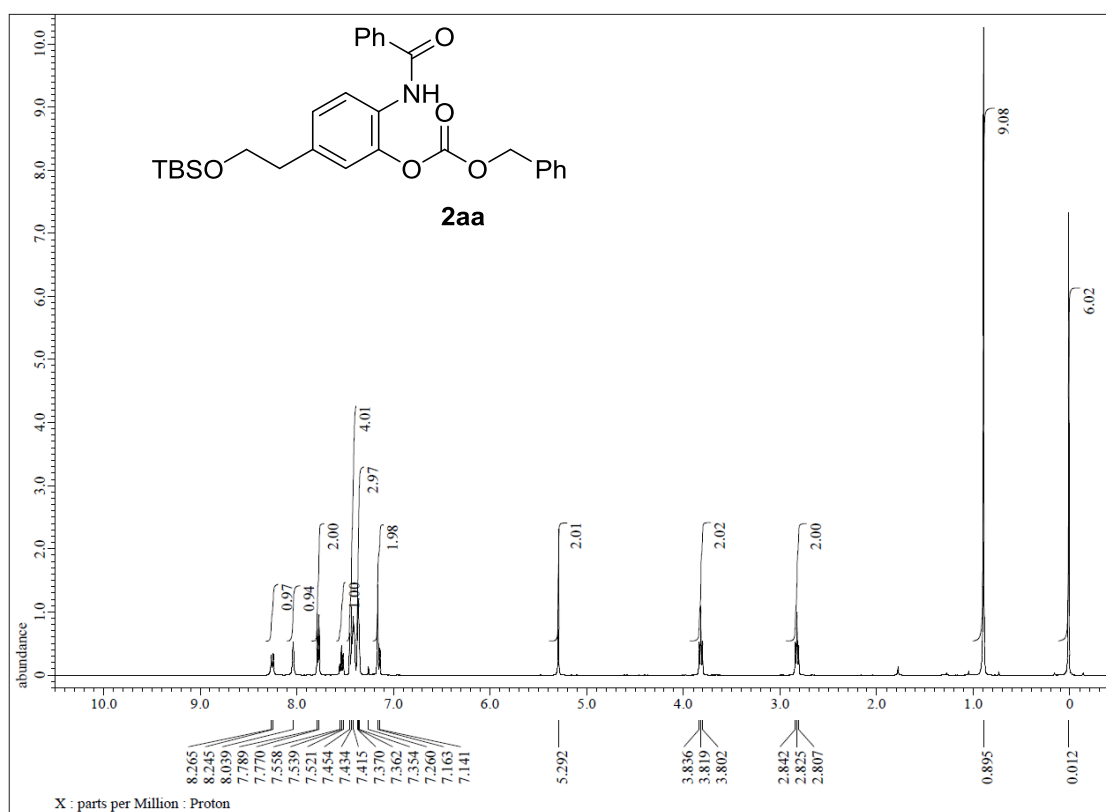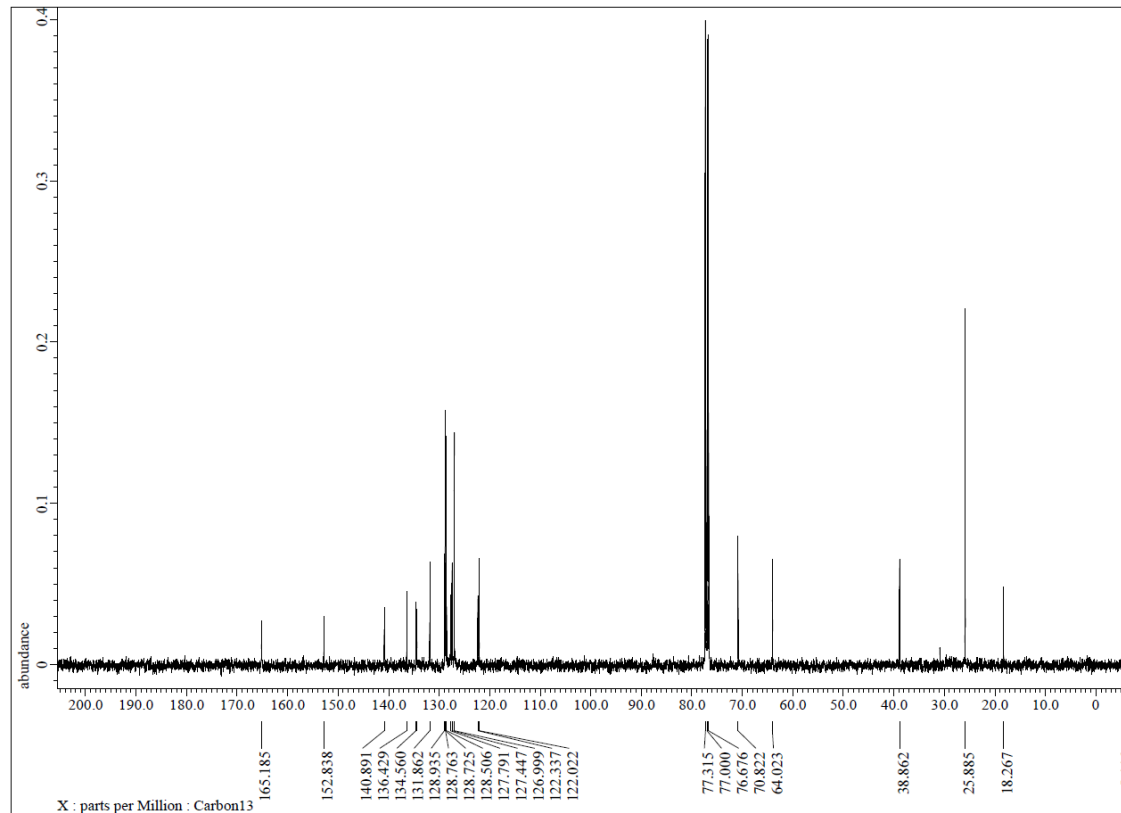

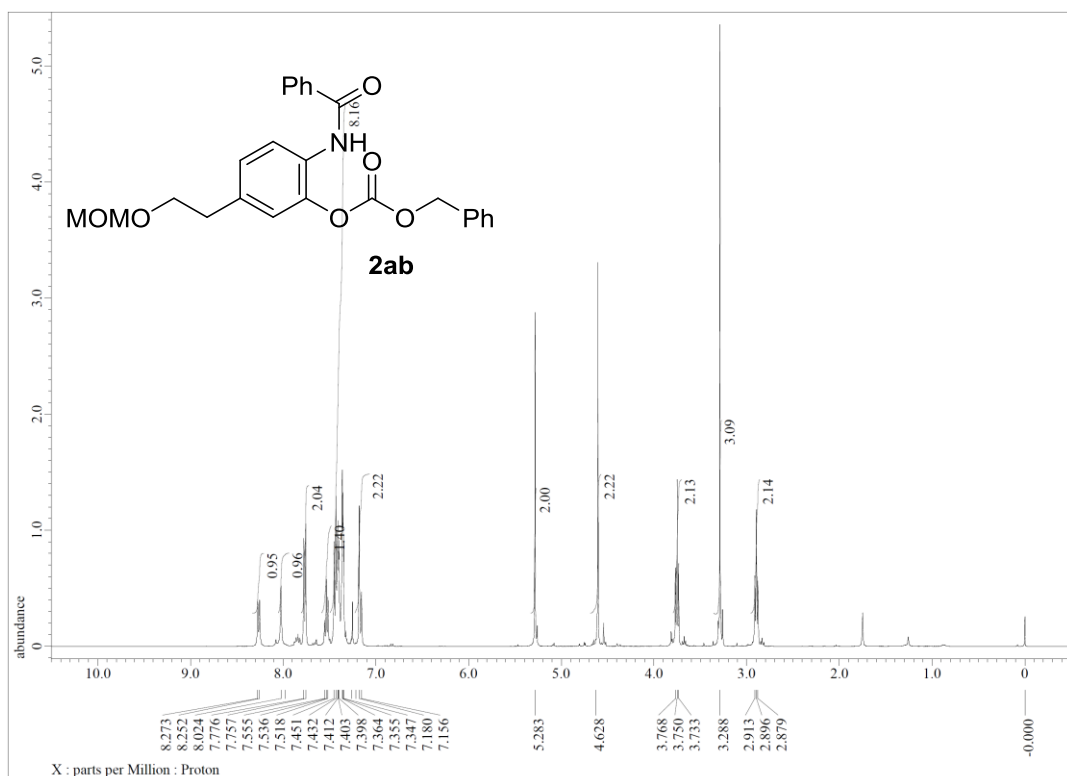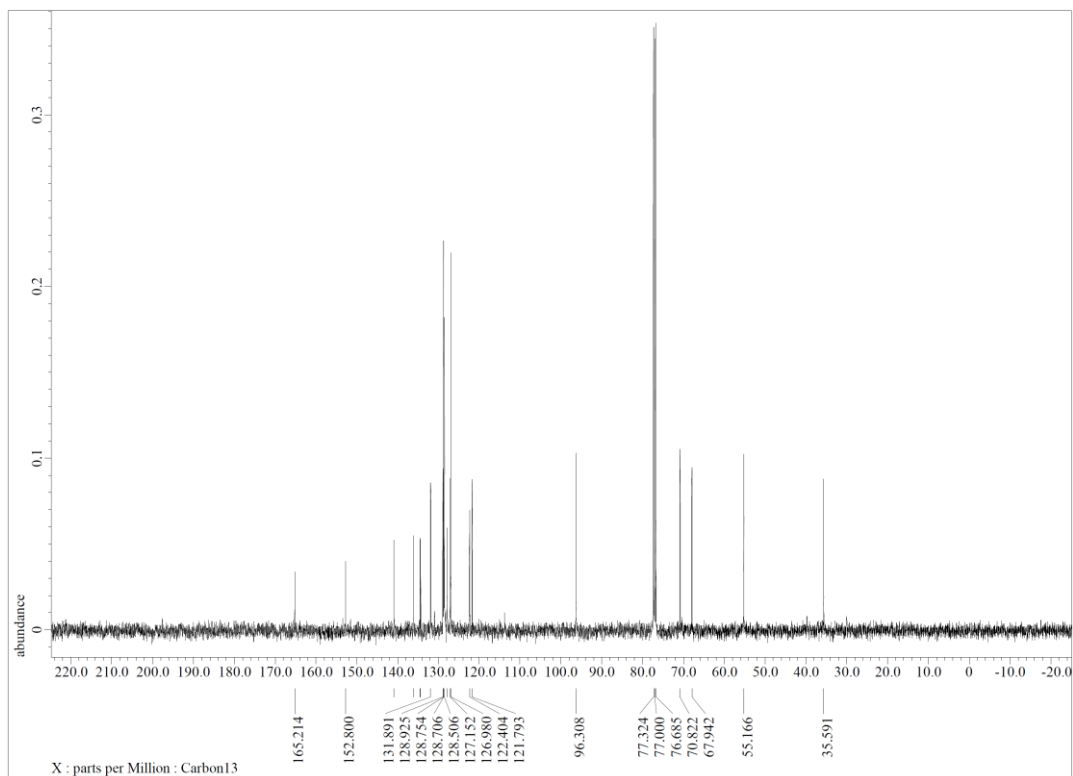

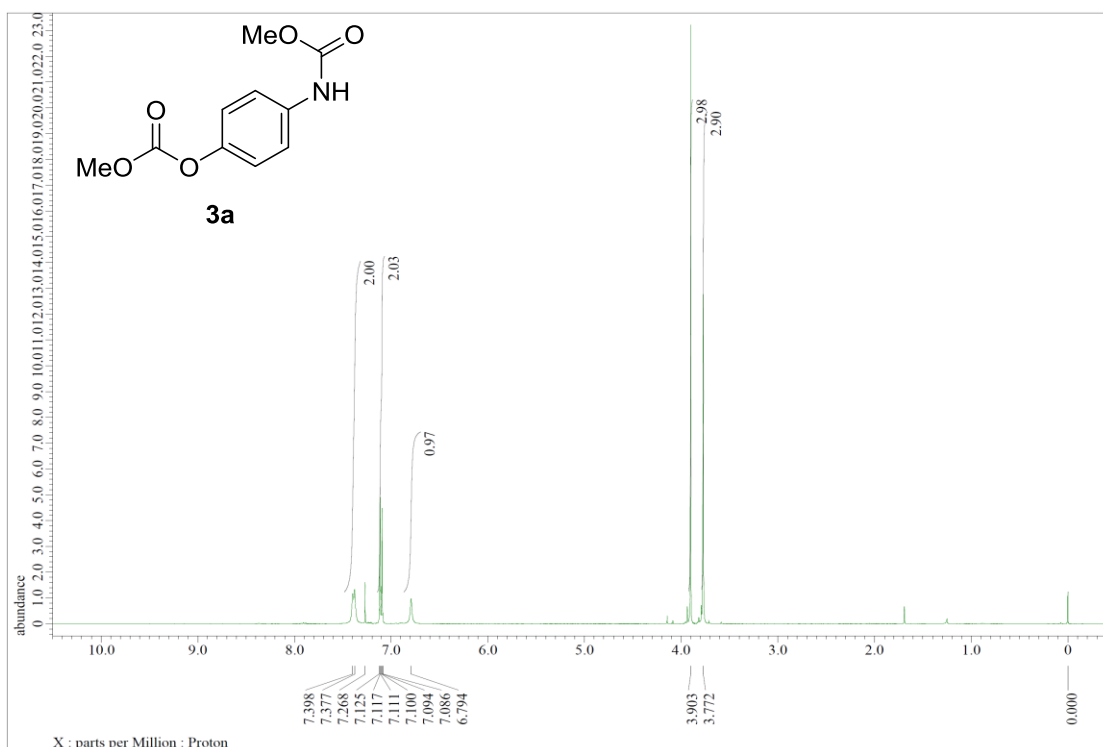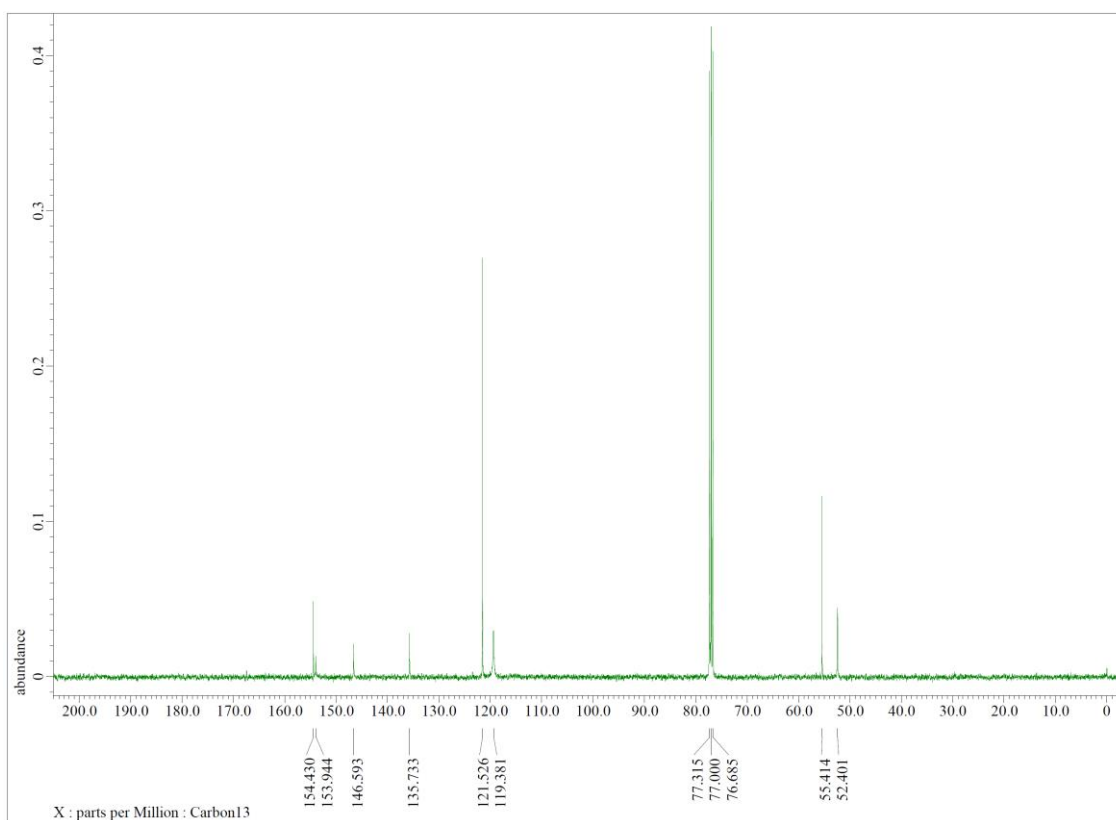

## 10. References

- [S1] Nakamura, I.; Owada, M.; Jo, T.; Terada, M. *Org. Lett.* **2017**, *19*, 2194.  
 [S2] Rajendran, G.; Van Etten, R. L. *Inorg. Chem.* **1986**, *25*, 876.  
 [S3] Rajendran, G.; Santini, R. E.; Van Etten, R. L. *J. Am. Chem. Soc.* **1987**, *109*, 4357.
